# Supplementary material for: Three non-bonding interaction topologies of the thiazole–formaldehyde complex observed by rotational spectroscopy
Source: Royal Society of Chemistry journal article supplement (doi:10.1039/d2cp05711e), 2023-01-01
Supplement: d2cp05711e1.pdf [file d2cp05711e1.pdf]

## Electronic Supplementary Information

### Three non-bonding interaction typologies of the thiazole-formaldehyde complex observed by rotational spectroscopy

Wenqin Li,<sup>a, b, #</sup> Yugao Xu,<sup>a, #</sup> Yan Jin,<sup>a</sup> Xiaolong Li,<sup>a</sup> Walther Caminati<sup>c</sup> and Gang Feng<sup>a, \*</sup>

<sup>a</sup> School of Chemistry and Chemical Engineering, Chongqing University, Daxuecheng South Rd. 55, 401331, Chongqing, China. \* E-mail: [fengg@cqu.edu.cn](mailto:fengg@cqu.edu.cn)

<sup>b</sup> Departamento de Química Física y Química Inorganica, Facultad de Ciencias, Universidad de Valladolid, E-47011 Valladolid, Spain.

<sup>c</sup> Dipartimento di Chimica "G. Ciamician", Università di Bologna, Via Selmi 2, I-40126 Bologna, Italy.

#### Content

1. **Figure S1:** Isomerization pathways between isomers **I-IV** and the relative transition states as well as potential energy curve connecting the isomerization of **I** and **II** and **III** and **IV**;
2. **Table S1:** Spectroscopic parameters of the seven isomers of the thiazole-formaldehyde complex calculated at the B3LYP-D3(BJ)/def2-TZVP level of theory;
3. **Table S2:** Rotational parameters obtained from analysis of the rotational spectra of the TZ-FA adduct compared to the B3LYP-D3(BJ)/6-311++G(d,p) (1), B3LYP-D3(BJ)/def2-TZVP (2), B3LYP-D3(BJ)/6-311++G(2d,p) (3), CCSD/6-311++G(2d,p) (4), and CCSD/6-311++G(d,p) (5) calculated constants for the four lowest isomers.
4. **Table S3:**  $r_0$  (isomers **I**, **II** and **III**) and  $r_e$  (isomer **IV**) structural coordinates in the principal axe system.
5. **Tables S4-S13:** The experimental transition frequencies for all the observed isomers and isotopologues;
6. **Table S14:**  $r_s$ ,  $r_0$ , and  $r_e$  coordinates for isomers **I - III**;
7. **Tables S15-S18:** The result of NBO analysis for isomers **I - IV**;

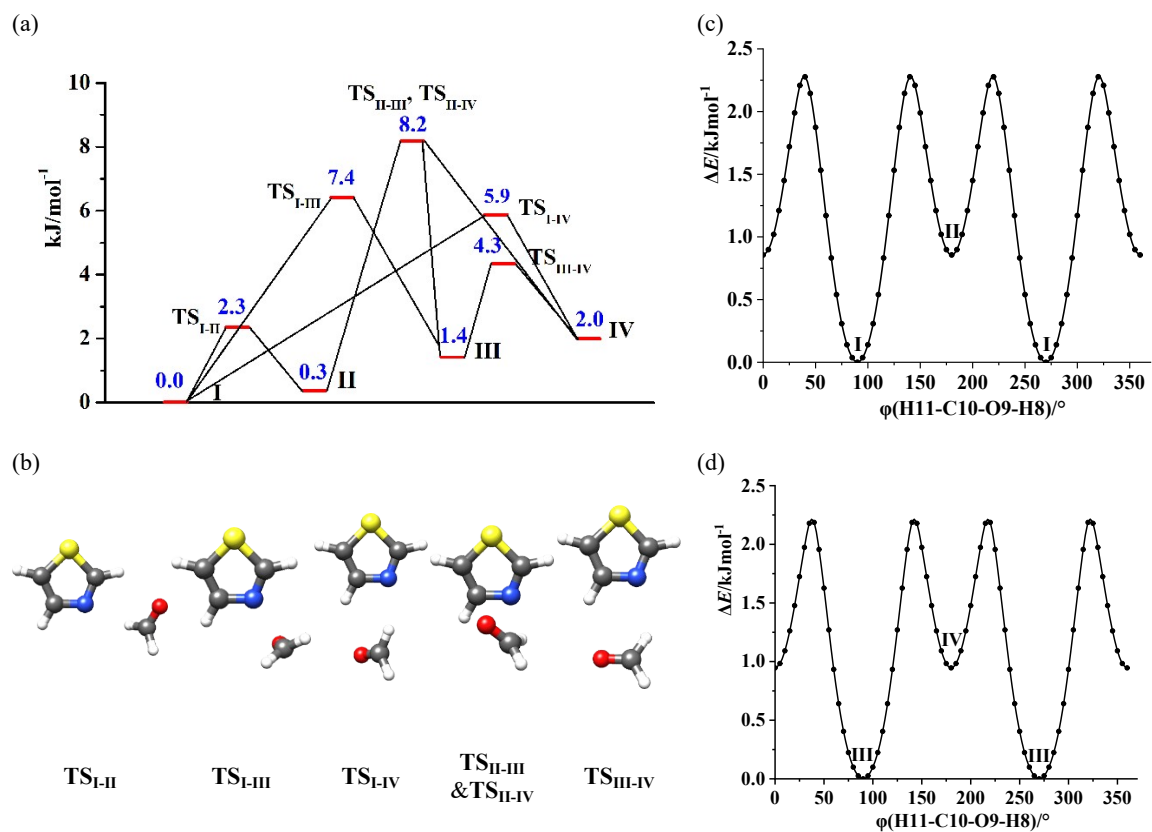

**Figure S1.** (a) Isomerization pathways between isomers **I-IV** and (b) the relative transition states as well as potential energy curve connecting the isomerization of **I** and **II** (c) and **III** and **IV** (d). The structures of the TSs were obtained at the B3LYP-D3(BJ)/def2-TZVP level of theory. The relative zero-point energies of the TSs and minima are calculated at the CCSD/6-311++G(2d,p) level.

**Table S1.** Energy minima of the thiazole-formaldehyde complex obtained at the B3LYP-D3(BJ)/def2-TZVP level of theory.

| Isomer                                 | I                                                                                 | II                                                                                | III                                                                               | IV                                                                                 | V                                                                                   | VI                                                                                  | VII                                                                                 |
|----------------------------------------|-----------------------------------------------------------------------------------|-----------------------------------------------------------------------------------|-----------------------------------------------------------------------------------|------------------------------------------------------------------------------------|-------------------------------------------------------------------------------------|-------------------------------------------------------------------------------------|-------------------------------------------------------------------------------------|
|                                        | 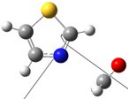 |  |  |  |  |  |  |
| $A/\text{MHz}$                         | 5299                                                                              | 5120                                                                              | 6887                                                                              | 6998                                                                               | 3190                                                                                | 5751                                                                                | 3434                                                                                |
| $B/\text{MHz}$                         | 1124                                                                              | 1000                                                                              | 1005                                                                              | 879                                                                                | 1649                                                                                | 1101                                                                                | 1384                                                                                |
| $C/\text{MHz}$                         | 933                                                                               | 837                                                                               | 882                                                                               | 781                                                                                | 1468                                                                                | 958                                                                                 | 1220                                                                                |
| $\mu_a/D$                              | -2.4                                                                              | 1.2                                                                               | -2.5                                                                              | -1.4                                                                               | -0.5                                                                                | 1.9                                                                                 | 2.3                                                                                 |
| $\mu_b/D$                              | 1.8                                                                               | 1.5                                                                               | -1.4                                                                              | 1.3                                                                                | -0.8                                                                                | -2.9                                                                                | 0.7                                                                                 |
| $\mu_c/D$                              | 0                                                                                 | 0                                                                                 | 0                                                                                 | 0                                                                                  | -0.4                                                                                | 1.3                                                                                 | -1.6                                                                                |
| $1.5\chi_{aa}/\text{MHz}$              | -5.10                                                                             | -3.87                                                                             | -4.80                                                                             | -3.77                                                                              | 3.06                                                                                | 1.39                                                                                | 2.31                                                                                |
| $0.25(\chi_{bb}-\chi_{cc})/\text{MHz}$ | -0.52                                                                             | -0.78                                                                             | -0.62                                                                             | -0.83                                                                              | -0.592                                                                              | -1.68                                                                               | -0.42                                                                               |
| $\Delta E_0/\text{kJmol}^{-1}$         | 0                                                                                 | 1.1                                                                               | 1.6                                                                               | 3.0                                                                                | 5.7                                                                                 | 5.6                                                                                 | 5.9                                                                                 |
| $D_0/\text{kJmol}^{-1}$                | -22.0                                                                             | -20.1                                                                             | -20.2                                                                             | -18.1                                                                              | -14.3                                                                               | -14.0                                                                               | -14.2                                                                               |
| $D_{0,\text{BSE}}/\text{kJmol}^{-1}$   | -20.8                                                                             | -18.5                                                                             | -18.9                                                                             | -16.5                                                                              | -13.4                                                                               | -13.3                                                                               | -12.9                                                                               |

**Table S2.** Rotational parameters obtained at the B3LYP-D3(BJ)/def2-TZVP (1), B3LYP-D3(BJ)/6-311++G(d,p) (2), B3LYP-D3(BJ)/6-311++G(2d,p) (3), B3LYP-D3(BJ)/aug-cc-pVDZ (4), CCSD/aug-cc-pVDZ (5), CCSD/6-311++G(d,p) (6), and CCSD/6-311++G(2d,p) (7) level of theories, as well as the ground vibrational state rotational constants calculated at the B3LYP-D3(BJ)/def2-TZVP level of theory (8). Experimental rotational constants and  $^{14}\text{N}$  quadrupole coupling constants are included for comparison.

| Parameters                             | Exp.    | 1     | 2     | 3     | 4     | 5     | 6     | 7     | 8    |
|----------------------------------------|---------|-------|-------|-------|-------|-------|-------|-------|------|
| <b>Isomer I</b>                        |         |       |       |       |       |       |       |       |      |
| $A/\text{MHz}$                         | 5213.62 | 5299  | 5250  | 5265  | 5214  | 5113  | 5198  | 5201  | 5258 |
| $B/\text{MHz}$                         | 1076.60 | 1124  | 1122  | 1122  | 1122  | 1082  | 1068  | 1077  | 1084 |
| $C/\text{MHz}$                         | 897.98  | 933   | 931   | 931   | 929   | 899   | 891   | 898   | 905  |
| $1.5\chi_{aa}/\text{MHz}$              | -4.50   | -5.10 | -5.07 | -5.02 | -4.61 | -4.29 | -4.85 | -4.80 |      |
| $0.25(\chi_{bb}-\chi_{cc})/\text{MHz}$ | -0.49   | -0.52 | -0.42 | -0.46 | -0.37 | -0.40 | -0.46 | -0.50 |      |
| <b>Isomer II</b>                       |         |       |       |       |       |       |       |       |      |
| $A/\text{MHz}$                         | 5102.02 | 5120  | 5068  | 5075  | 5007  | 4929  | 5049  | 5042  | 5114 |
| $B/\text{MHz}$                         | 989.97  | 1000  | 1004  | 1001  | 1002  | 928   | 970   | 977   | 981  |
| $C/\text{MHz}$                         | 829.68  | 837   | 838   | 836   | 834   | 819   | 814   | 818   | 823  |
| $1.5\chi_{aa}/\text{MHz}$              | -4.21   | -3.87 | -3.78 | -3.65 | -3.31 | -2.92 | -4.57 | -3.44 |      |
| $0.25(\chi_{bb}-\chi_{cc})/\text{MHz}$ | -0.56   | -0.78 | -0.68 | -0.74 | -0.64 | -0.65 | -0.54 | -0.75 |      |
| <b>Isomer III</b>                      |         |       |       |       |       |       |       |       |      |
| $A/\text{MHz}$                         | 6862.08 | 6887  | 6840  | 6860  | 6800  | 6758  | 6855  | 6849  | 6836 |
| $B/\text{MHz}$                         | 955.20  | 1005  | 1004  | 1003  | 1003  | 961   | 948   | 957   | 968  |
| $C/\text{MHz}$                         | 843.90  | 882   | 881   | 881   | 879   | 847   | 838   | 844   | 854  |
| $1.5\chi_{aa}/\text{MHz}$              | -4.21   | -4.80 | -4.74 | -4.76 | -4.20 | -3.95 | -3.55 | -4.62 |      |
| $0.25(\chi_{bb}-\chi_{cc})/\text{MHz}$ | -0.56   | -0.62 | -0.52 | -0.54 | -0.48 | -0.49 | -0.69 | -0.57 |      |
| <b>Isomer IV</b>                       |         |       |       |       |       |       |       |       |      |
| $A/\text{MHz}$                         |         | 6998  | 6948  | 6963  | 6891  | 6828  | 6951  | 6938  | 6947 |
| $B/\text{MHz}$                         |         | 879   | 881   | 878   | 874   | 855   | 848   | 854   | 863  |
| $C/\text{MHz}$                         |         | 781   | 782   | 780   | 776   | 760   | 756   | 760   | 768  |
| $1.5\chi_{aa}/\text{MHz}$              |         | -3.77 | -3.69 | -3.63 | -3.06 | -2.77 | -3.41 | -3.47 |      |
| $0.25(\chi_{bb}-\chi_{cc})/\text{MHz}$ |         | -0.83 | -0.74 | -0.78 | -0.71 | -0.71 | -0.75 | -0.76 |      |

**Table S3.**  $r_0$  (isomers **I**, **II** and **III**) and  $r_e$  (isomer **IV**) structural coordinates in the principal axe system.

| Isomer     | Atom | $a/\text{\AA}$ | $b/\text{\AA}$ | $c/\text{\AA}$ |
|------------|------|----------------|----------------|----------------|
| <b>I</b>   | S    | -1.744         | -0.934         | 0.000          |
|            | C    | -0.057         | -0.526         | 0.000          |
|            | N    | 0.208          | 0.746          | 0.000          |
|            | C    | -0.965         | 1.481          | 0.000          |
|            | C    | -2.116         | 0.756          | 0.000          |
|            | H    | -3.133         | 1.118          | 0.000          |
|            | H    | -0.911         | 2.562          | 0.000          |
|            | H    | 0.707          | -1.292         | 0.000          |
|            | O    | 3.151          | -0.719         | 0.000          |
|            | C    | 3.104          | 0.486          | 0.000          |
|            | H    | 3.085          | 1.067          | -0.937         |
|            | H    | 3.078          | 1.067          | 0.937          |
| <b>II</b>  | S    | -1.670         | -1.014         | 0.000          |
|            | C    | -0.044         | -0.384         | 0.000          |
|            | N    | 0.036          | 0.915          | 0.000          |
|            | C    | -1.216         | 1.486          | 0.000          |
|            | C    | -2.262         | 0.612          | 0.000          |
|            | H    | -3.319         | 0.824          | 0.000          |
|            | H    | -1.306         | 2.564          | 0.000          |
|            | H    | 0.817          | -1.040         | 0.000          |
|            | O    | 3.215          | -0.708         | 0.000          |
|            | C    | 3.382          | 0.488          | 0.000          |
|            | H    | 2.529          | 1.189          | 0.000          |
|            | H    | 4.401          | 0.923          | 0.000          |
| <b>III</b> | S    | -2.313         | -0.127         | 0.000          |
|            | C    | -0.905         | -1.152         | 0.000          |
|            | N    | 0.230          | -0.519         | 0.000          |
|            | C    | 0.039          | 0.844          | 0.000          |
|            | C    | -1.262         | 1.250          | 0.000          |
|            | H    | -1.654         | 2.254          | 0.000          |
|            | H    | 0.904          | 1.492          | 0.000          |
|            | H    | -1.004         | -2.228         | 0.000          |
|            | O    | 3.428          | 0.531          | 0.000          |
|            | C    | 3.106          | -0.631         | 0.000          |
|            | H    | 2.949          | -1.197         | -0.936         |
|            | H    | 2.949          | -1.197         | 0.936          |
| <b>IV</b>  | N    | 0.026          | 0.800          | 0.000          |
|            | C    | 0.086          | -0.586         | 0.000          |
|            | C    | -1.116         | -1.223         | 0.000          |
|            | S    | -2.403         | -0.065         | 0.000          |
|            | C    | -1.210         | 1.197          | 0.000          |
|            | O    | 3.494          | -0.625         | 0.000          |
|            | C    | 3.510          | 0.584          | 0.000          |
|            | H    | -1.305         | -2.285         | 0.000          |
|            | H    | 1.055          | -1.068         | 0.000          |
|            | H    | -1.503         | 2.239          | 0.000          |
|            | H    | 4.464          | 1.141          | 0.000          |
|            | H    | 2.578          | 1.173          | 0.000          |

**Table S4.** Observed rotational transitions and residuals (in MHz) for isomer I of the thiazole-formaldehyde complex.

| $J'$ | $K_a'$ | $K_c'$ | $F'$ | $\nu'$ | $J''$ | $K_a''$ | $K_c''$ | $F''$ | $\nu''$ | Obs.       | Obs.-Cal. |
|------|--------|--------|------|--------|-------|---------|---------|-------|---------|------------|-----------|
| 3    | 0      | 3      | 4    | 1      | 2     | 0       | 2       | 3     | 1       | 5901.8964  | 0.0008    |
| 3    | 0      | 3      | 3    | 1      | 2     | 0       | 2       | 2     | 1       | 5901.8335  | -0.0064   |
| 3    | 0      | 3      | 2    | 1      | 2     | 0       | 2       | 1     | 1       | 5901.7160  | 0.0016    |
| 3    | 1      | 3      | 4    | 1      | 2     | 1       | 2       | 3     | 1       | 5653.1583  | -0.0020   |
| 3    | 1      | 3      | 3    | 1      | 2     | 1       | 2       | 2     | 1       | 5652.8732  | -0.0039   |
| 3    | 1      | 3      | 2    | 1      | 2     | 1       | 2       | 1     | 1       | 5653.0937  | -0.0022   |
| 3    | 1      | 2      | 4    | 1      | 2     | 1       | 1       | 3     | 1       | 6188.7988  | -0.0038   |
| 3    | 1      | 2      | 3    | 1      | 2     | 1       | 1       | 2     | 1       | 6188.5399  | -0.0025   |
| 3    | 1      | 2      | 2    | 1      | 2     | 1       | 1       | 1     | 1       | 6188.8581  | -0.0007   |
| 3    | 2      | 2      | 4    | 1      | 2     | 2       | 1       | 3     | 1       | 5924.6186  | 0.0004    |
| 3    | 2      | 2      | 3    | 1      | 2     | 2       | 1       | 2     | 1       | 5923.6517  | -0.0033   |
| 3    | 2      | 2      | 2    | 1      | 2     | 2       | 1       | 1     | 1       | 5925.1527  | -0.0007   |
| 3    | 2      | 2      | 3    | 1      | 2     | 2       | 1       | 3     | 1       | 5924.6186  | 0.0003    |
| 3    | 2      | 2      | 2    | 1      | 2     | 2       | 1       | 2     | 1       | 5923.6517  | -0.0035   |
| 4    | 0      | 4      | 5    | 1      | 3     | 0       | 3       | 4     | 1       | 7842.9927  | -0.0030   |
| 4    | 0      | 4      | 4    | 1      | 3     | 0       | 3       | 3     | 1       | 7842.9438  | -0.0022   |
| 4    | 0      | 4      | 3    | 1      | 3     | 0       | 3       | 2     | 1       | 7842.9055  | -0.0072   |
| 4    | 1      | 4      | 5    | 1      | 3     | 1       | 3       | 4     | 1       | 7531.0793  | -0.0031   |
| 4    | 1      | 4      | 4    | 1      | 3     | 1       | 3       | 3     | 1       | 7530.9470  | -0.0027   |
| 4    | 1      | 4      | 3    | 1      | 3     | 1       | 3       | 2     | 1       | 7531.0163  | -0.0001   |
| 4    | 1      | 3      | 5    | 1      | 3     | 1       | 2       | 4     | 1       | 8244.7452  | 0.0000    |
| 4    | 1      | 3      | 4    | 1      | 3     | 1       | 2       | 3     | 1       | 8244.6268  | 0.0001    |
| 4    | 1      | 3      | 3    | 1      | 3     | 1       | 2       | 2     | 1       | 8244.7301  | -0.0057   |
| 4    | 2      | 3      | 5    | 1      | 3     | 2       | 2       | 4     | 1       | 7894.8534  | -0.0012   |
| 4    | 2      | 3      | 4    | 1      | 3     | 2       | 2       | 3     | 1       | 7894.4402  | -0.0026   |
| 4    | 2      | 3      | 3    | 1      | 3     | 2       | 2       | 2     | 1       | 7894.9581  | -0.0023   |
| 4    | 2      | 2      | 5    | 1      | 3     | 2       | 1       | 4     | 1       | 7951.0790  | -0.0021   |
| 4    | 2      | 2      | 4    | 1      | 3     | 2       | 1       | 3     | 1       | 7950.6925  | -0.0038   |
| 4    | 2      | 2      | 3    | 1      | 3     | 2       | 1       | 2     | 1       | 7951.1759  | -0.0071   |
| 5    | 0      | 5      | 6    | 1      | 4     | 0       | 4       | 5     | 1       | 9762.4593  | -0.0024   |
| 5    | 0      | 5      | 5    | 1      | 4     | 0       | 4       | 4     | 1       | 9762.4113  | -0.0013   |
| 5    | 0      | 5      | 4    | 1      | 4     | 0       | 4       | 3     | 1       | 9762.4113  | -0.0026   |
| 5    | 1      | 5      | 6    | 1      | 4     | 1       | 4       | 5     | 1       | 9403.8690  | -0.0039   |
| 5    | 1      | 5      | 5    | 1      | 4     | 1       | 4       | 4     | 1       | 9403.7953  | 0.0004    |
| 5    | 1      | 5      | 4    | 1      | 4     | 1       | 4       | 3     | 1       | 9403.8266  | 0.0024    |
| 5    | 1      | 4      | 6    | 1      | 4     | 1       | 3       | 5     | 1       | 10294.4076 | -0.0104   |
| 5    | 1      | 4      | 5    | 1      | 4     | 1       | 3       | 4     | 1       | 10294.3462 | -0.0024   |
| 5    | 1      | 4      | 4    | 1      | 4     | 1       | 3       | 3     | 1       | 10294.4076 | 0.0047    |
| 5    | 2      | 4      | 6    | 1      | 4     | 2       | 3       | 5     | 1       | 9861.3322  | 0.0000    |
| 5    | 2      | 4      | 5    | 1      | 4     | 2       | 3       | 4     | 1       | 9861.1102  | -0.0032   |
| 5    | 2      | 4      | 4    | 1      | 4     | 2       | 3       | 3     | 1       | 9861.3547  | 0.0000    |
| 5    | 2      | 3      | 6    | 1      | 4     | 2       | 2       | 5     | 1       | 9972.7736  | 0.0007    |
| 5    | 2      | 3      | 5    | 1      | 4     | 2       | 2       | 4     | 1       | 9972.5872  | -0.0002   |
| 5    | 2      | 3      | 4    | 1      | 4     | 2       | 2       | 3     | 1       | 9972.7899  | -0.0018   |
| 5    | 3      | 3      | 6    | 1      | 4     | 3       | 2       | 5     | 1       | 9892.1557  | 0.0015    |
| 5    | 3      | 3      | 5    | 1      | 4     | 3       | 2       | 4     | 1       | 9891.6985  | 0.0003    |
| 5    | 3      | 3      | 4    | 1      | 4     | 3       | 2       | 3     | 1       | 9892.2671  | 0.0004    |
| 5    | 3      | 2      | 6    | 1      | 4     | 3       | 1       | 5     | 1       | 9894.5032  | 0.0009    |
| 5    | 3      | 2      | 5    | 1      | 4     | 3       | 1       | 4     | 1       | 9894.0491  | 0.0015    |
| 5    | 3      | 2      | 4    | 1      | 4     | 3       | 1       | 3     | 1       | 9894.6138  | -0.0007   |
| 6    | 0      | 6      | 7    | 1      | 5     | 0       | 5       | 6     | 1       | 11656.5500 | -0.0013   |
| 6    | 0      | 6      | 6    | 1      | 5     | 0       | 5       | 5     | 1       | 11656.4998 | -0.0013   |
| 6    | 0      | 6      | 5    | 1      | 5     | 0       | 5       | 4     | 1       | 11656.5128 | -0.0076   |
| 6    | 0      | 6      | 6    | 1      | 5     | 0       | 5       | 6     | 1       | 11655.3662 | -0.0047   |
| 6    | 1      | 6      | 7    | 1      | 5     | 1       | 5       | 6     | 1       | 11270.6256 | -0.0010   |

|   |   |   |    |   |   |   |   |   |   |            |         |
|---|---|---|----|---|---|---|---|---|---|------------|---------|
| 6 | 1 | 6 | 6  | 1 | 5 | 1 | 5 | 5 | 1 | 11270.5739 | 0.0005  |
| 6 | 1 | 6 | 5  | 1 | 5 | 1 | 5 | 4 | 1 | 11270.5862 | -0.0044 |
| 6 | 1 | 5 | 7  | 1 | 5 | 1 | 4 | 6 | 1 | 12335.8053 | -0.0029 |
| 6 | 1 | 5 | 6  | 1 | 5 | 1 | 4 | 5 | 1 | 12335.7573 | -0.0026 |
| 6 | 1 | 5 | 5  | 1 | 5 | 1 | 4 | 4 | 1 | 12335.8026 | 0.0077  |
| 6 | 2 | 5 | 7  | 1 | 5 | 2 | 4 | 6 | 1 | 11823.0724 | 0.0020  |
| 6 | 2 | 5 | 6  | 1 | 5 | 2 | 4 | 5 | 1 | 11822.9351 | -0.0019 |
| 6 | 2 | 5 | 5  | 1 | 5 | 2 | 4 | 4 | 1 | 11823.0724 | 0.0015  |
| 6 | 2 | 4 | 7  | 1 | 5 | 2 | 3 | 6 | 1 | 12014.9960 | -0.0025 |
| 6 | 2 | 4 | 6  | 1 | 5 | 2 | 3 | 5 | 1 | 12014.9034 | -0.0004 |
| 6 | 2 | 4 | 5  | 1 | 5 | 2 | 3 | 4 | 1 | 12014.9960 | 0.0002  |
| 6 | 3 | 4 | 7  | 1 | 5 | 3 | 3 | 6 | 1 | 11876.4784 | 0.0006  |
| 6 | 3 | 4 | 6  | 1 | 5 | 3 | 3 | 5 | 1 | 11876.2112 | -0.0006 |
| 6 | 3 | 4 | 5  | 1 | 5 | 3 | 3 | 4 | 1 | 11876.5189 | -0.0006 |
| 6 | 3 | 3 | 7  | 1 | 5 | 3 | 2 | 6 | 1 | 11882.7246 | 0.0010  |
| 6 | 3 | 3 | 6  | 1 | 5 | 3 | 2 | 5 | 1 | 11882.4641 | 0.0038  |
| 6 | 3 | 3 | 5  | 1 | 5 | 3 | 2 | 4 | 1 | 11882.7647 | -0.0003 |
| 6 | 4 | 3 | 7  | 1 | 5 | 4 | 2 | 6 | 1 | 11867.5233 | 0.0039  |
| 6 | 4 | 3 | 5  | 1 | 5 | 4 | 2 | 4 | 1 | 11867.6215 | 0.0011  |
| 6 | 4 | 2 | 7  | 1 | 5 | 4 | 1 | 6 | 1 | 11867.5866 | 0.0011  |
| 7 | 0 | 7 | 8  | 1 | 6 | 0 | 6 | 7 | 1 | 13523.4213 | 0.0001  |
| 7 | 0 | 7 | 7  | 1 | 6 | 0 | 6 | 6 | 1 | 13523.3655 | -0.0043 |
| 7 | 0 | 7 | 6  | 1 | 6 | 0 | 6 | 5 | 1 | 13523.4016 | 0.0021  |
| 7 | 1 | 7 | 8  | 1 | 6 | 1 | 6 | 7 | 1 | 13130.6878 | 0.0015  |
| 7 | 1 | 7 | 7  | 1 | 6 | 1 | 6 | 6 | 1 | 13130.6514 | 0.0053  |
| 7 | 1 | 7 | 6  | 1 | 6 | 1 | 6 | 5 | 1 | 13130.6514 | -0.0075 |
| 7 | 1 | 6 | 8  | 1 | 6 | 1 | 5 | 7 | 1 | 14366.6232 | -0.0015 |
| 7 | 1 | 6 | 7  | 1 | 6 | 1 | 5 | 6 | 1 | 14366.5818 | -0.0042 |
| 7 | 1 | 6 | 6  | 1 | 6 | 1 | 5 | 5 | 1 | 14366.6232 | 0.0092  |
| 7 | 2 | 6 | 8  | 1 | 6 | 2 | 5 | 7 | 1 | 13779.1373 | 0.0081  |
| 7 | 2 | 6 | 7  | 1 | 6 | 2 | 5 | 6 | 1 | 13779.0395 | 0.0000  |
| 7 | 2 | 6 | 6  | 1 | 6 | 2 | 5 | 5 | 1 | 13779.1232 | -0.0001 |
| 7 | 2 | 5 | 8  | 1 | 6 | 2 | 4 | 7 | 1 | 14078.5881 | 0.0048  |
| 7 | 2 | 5 | 7  | 1 | 6 | 2 | 4 | 6 | 1 | 14078.5398 | 0.0039  |
| 7 | 2 | 5 | 6  | 1 | 6 | 2 | 4 | 5 | 1 | 14078.5700 | -0.0045 |
| 8 | 0 | 8 | 9  | 1 | 7 | 0 | 7 | 8 | 1 | 15363.7231 | -0.0002 |
| 8 | 0 | 8 | 8  | 1 | 7 | 0 | 7 | 7 | 1 | 15363.6732 | 0.0009  |
| 8 | 0 | 8 | 7  | 1 | 7 | 0 | 7 | 6 | 1 | 15363.7138 | 0.0066  |
| 8 | 1 | 8 | 9  | 1 | 7 | 1 | 7 | 8 | 1 | 14983.6606 | 0.0040  |
| 8 | 1 | 8 | 8  | 1 | 7 | 1 | 7 | 7 | 1 | 14983.6295 | 0.0055  |
| 8 | 1 | 8 | 7  | 1 | 7 | 1 | 7 | 6 | 1 | 14983.6449 | 0.0095  |
| 8 | 1 | 7 | 9  | 1 | 7 | 1 | 6 | 8 | 1 | 16384.2545 | 0.0034  |
| 8 | 1 | 7 | 8  | 1 | 7 | 1 | 6 | 7 | 1 | 16384.2114 | -0.0051 |
| 8 | 1 | 7 | 7  | 1 | 7 | 1 | 6 | 6 | 1 | 16384.2545 | 0.0120  |
| 9 | 0 | 9 | 10 | 1 | 8 | 0 | 8 | 9 | 1 | 17180.6900 | 0.0049  |
| 9 | 0 | 9 | 9  | 1 | 8 | 0 | 8 | 8 | 1 | 17180.6427 | 0.0069  |
| 9 | 0 | 9 | 8  | 1 | 8 | 0 | 8 | 7 | 1 | 17180.6900 | 0.0176  |
| 2 | 1 | 2 | 2  | 1 | 1 | 0 | 1 | 1 | 1 | 7908.2098  | -0.0053 |
| 2 | 1 | 2 | 1  | 1 | 1 | 0 | 1 | 0 | 1 | 7907.1945  | -0.0093 |
| 3 | 1 | 3 | 2  | 1 | 2 | 0 | 2 | 1 | 1 | 9617.0383  | -0.0044 |
| 3 | 1 | 3 | 4  | 1 | 2 | 0 | 2 | 3 | 1 | 9617.2059  | -0.0018 |
| 3 | 1 | 3 | 3  | 1 | 2 | 0 | 2 | 2 | 1 | 9617.1062  | 0.0004  |
| 3 | 2 | 1 | 4  | 1 | 3 | 1 | 2 | 3 | 1 | 12175.3035 | -0.0109 |
| 3 | 2 | 1 | 3  | 1 | 3 | 1 | 2 | 2 | 1 | 12174.7697 | 0.0016  |
| 3 | 2 | 1 | 4  | 1 | 3 | 1 | 2 | 4 | 1 | 12174.8856 | -0.0002 |
| 3 | 2 | 1 | 3  | 1 | 3 | 1 | 2 | 3 | 1 | 12175.3454 | -0.0016 |
| 4 | 1 | 4 | 3  | 1 | 3 | 0 | 3 | 2 | 1 | 11246.3431 | -0.0016 |
| 4 | 1 | 4 | 4  | 1 | 3 | 0 | 3 | 3 | 1 | 11246.2142 | -0.0013 |

|   |   |   |   |   |   |   |   |   |   |            |         |
|---|---|---|---|---|---|---|---|---|---|------------|---------|
| 4 | 1 | 4 | 5 | 1 | 3 | 0 | 3 | 4 | 1 | 11246.3905 | -0.0040 |
| 2 | 2 | 0 | 3 | 1 | 2 | 1 | 1 | 3 | 1 | 12416.4784 | -0.0038 |
| 2 | 2 | 0 | 2 | 1 | 2 | 1 | 1 | 2 | 1 | 12417.6235 | -0.0029 |
| 2 | 2 | 0 | 1 | 1 | 2 | 1 | 1 | 1 | 1 | 12415.8387 | -0.0073 |
| 2 | 2 | 0 | 3 | 1 | 1 | 1 | 1 | 2 | 1 | 16723.3870 | -0.0006 |
| 2 | 2 | 0 | 2 | 1 | 1 | 1 | 1 | 1 | 1 | 16724.2020 | -0.0043 |
| 2 | 2 | 1 | 3 | 1 | 1 | 1 | 0 | 2 | 1 | 16539.2246 | -0.0068 |
| 2 | 2 | 1 | 2 | 1 | 1 | 1 | 0 | 1 | 1 | 16539.4526 | -0.0004 |
| 2 | 2 | 1 | 1 | 1 | 1 | 1 | 0 | 0 | 1 | 16539.8012 | -0.0075 |
| 2 | 2 | 1 | 2 | 1 | 2 | 1 | 2 | 2 | 1 | 12948.2388 | 0.0021  |
| 2 | 2 | 1 | 1 | 1 | 2 | 1 | 2 | 1 | 1 | 12945.5056 | 0.0035  |
| 3 | 2 | 2 | 4 | 1 | 3 | 1 | 3 | 4 | 1 | 13217.9427 | 0.0092  |
| 3 | 2 | 2 | 3 | 1 | 3 | 1 | 3 | 3 | 1 | 13219.0220 | 0.0075  |
| 3 | 2 | 2 | 2 | 1 | 3 | 1 | 3 | 2 | 1 | 13217.5690 | 0.0094  |
| 4 | 2 | 3 | 5 | 1 | 4 | 1 | 4 | 5 | 1 | 13581.7132 | 0.0043  |
| 4 | 2 | 3 | 4 | 1 | 4 | 1 | 4 | 4 | 1 | 13582.5101 | 0.0025  |
| 4 | 2 | 3 | 3 | 1 | 4 | 1 | 4 | 3 | 1 | 13581.5095 | 0.0059  |
| 4 | 2 | 2 | 5 | 1 | 4 | 1 | 3 | 5 | 1 | 11881.2181 | -0.0036 |
| 4 | 2 | 2 | 4 | 1 | 4 | 1 | 3 | 4 | 1 | 11881.4204 | 0.0036  |
| 4 | 2 | 2 | 3 | 1 | 4 | 1 | 3 | 3 | 1 | 11881.1702 | -0.0013 |
| 5 | 1 | 5 | 5 | 1 | 4 | 0 | 4 | 4 | 1 | 12807.0634 | -0.0008 |
| 5 | 1 | 5 | 4 | 1 | 4 | 0 | 4 | 3 | 1 | 12807.2538 | -0.0023 |
| 5 | 1 | 5 | 6 | 1 | 4 | 0 | 4 | 5 | 1 | 12807.2692 | -0.0025 |
| 5 | 0 | 5 | 4 | 1 | 4 | 1 | 4 | 3 | 1 | 6358.9858  | 0.0038  |
| 5 | 0 | 5 | 5 | 1 | 4 | 1 | 4 | 4 | 1 | 6359.1392  | -0.0040 |
| 5 | 0 | 5 | 6 | 1 | 4 | 1 | 4 | 5 | 1 | 6359.0532  | -0.0097 |
| 5 | 2 | 4 | 6 | 1 | 5 | 1 | 5 | 6 | 1 | 14039.1728 | 0.0046  |
| 5 | 2 | 4 | 5 | 1 | 5 | 1 | 5 | 5 | 1 | 14039.8299 | 0.0036  |
| 5 | 2 | 4 | 4 | 1 | 5 | 1 | 5 | 4 | 1 | 14039.0283 | -0.0058 |
| 5 | 2 | 3 | 6 | 1 | 5 | 1 | 4 | 6 | 1 | 11559.5726 | -0.0039 |
| 5 | 2 | 3 | 5 | 1 | 5 | 1 | 4 | 5 | 1 | 11559.6538 | -0.0017 |
| 5 | 2 | 3 | 4 | 1 | 5 | 1 | 4 | 4 | 1 | 11559.5699 | 0.0094  |
| 6 | 1 | 6 | 6 | 1 | 5 | 0 | 5 | 5 | 1 | 14315.2260 | 0.0010  |
| 6 | 1 | 6 | 5 | 1 | 5 | 0 | 5 | 4 | 1 | 14315.4338 | 0.0009  |
| 6 | 1 | 6 | 7 | 1 | 5 | 0 | 5 | 6 | 1 | 14315.4338 | -0.0027 |
| 6 | 0 | 6 | 5 | 1 | 5 | 1 | 5 | 4 | 1 | 8611.6711  | -0.0071 |
| 6 | 0 | 6 | 6 | 1 | 5 | 1 | 5 | 5 | 1 | 8611.8473  | -0.0022 |
| 6 | 0 | 6 | 7 | 1 | 5 | 1 | 5 | 6 | 1 | 8611.7431  | 0.0016  |
| 7 | 1 | 7 | 8 | 1 | 6 | 0 | 6 | 7 | 1 | 15789.5714 | 0.0000  |
| 7 | 1 | 7 | 7 | 1 | 6 | 0 | 6 | 6 | 1 | 15789.3716 | 0.0016  |
| 7 | 1 | 7 | 6 | 1 | 6 | 0 | 6 | 5 | 1 | 15789.5714 | 0.0000  |
| 7 | 0 | 7 | 8 | 1 | 6 | 1 | 6 | 7 | 1 | 10864.5287 | -0.0071 |
| 7 | 0 | 7 | 7 | 1 | 6 | 1 | 6 | 6 | 1 | 10864.6473 | 0.0013  |
| 7 | 0 | 7 | 6 | 1 | 6 | 1 | 6 | 5 | 1 | 10864.4845 | -0.0024 |
| 3 | 0 | 3 | 4 | 0 | 2 | 0 | 2 | 3 | 0 | 5901.1525  | 0.0044  |
| 3 | 0 | 3 | 3 | 0 | 2 | 0 | 2 | 2 | 0 | 5901.0963  | 0.0039  |
| 3 | 0 | 3 | 2 | 0 | 2 | 0 | 2 | 1 | 0 | 5900.9705  | 0.0037  |
| 3 | 1 | 3 | 4 | 0 | 2 | 1 | 2 | 3 | 0 | 5652.3877  | -0.0004 |
| 3 | 1 | 3 | 3 | 0 | 2 | 1 | 2 | 2 | 0 | 5652.1076  | 0.0025  |
| 3 | 1 | 3 | 2 | 0 | 2 | 1 | 2 | 1 | 0 | 5652.3267  | 0.0028  |
| 3 | 1 | 2 | 4 | 0 | 2 | 1 | 1 | 3 | 0 | 6188.0912  | 0.0033  |
| 3 | 1 | 2 | 3 | 0 | 2 | 1 | 1 | 2 | 0 | 6187.8327  | 0.0050  |
| 3 | 1 | 2 | 2 | 0 | 2 | 1 | 1 | 1 | 0 | 6188.1518  | 0.0077  |
| 3 | 2 | 2 | 4 | 0 | 2 | 2 | 1 | 3 | 0 | 5923.8776  | 0.0021  |
| 3 | 2 | 2 | 3 | 0 | 2 | 2 | 1 | 2 | 0 | 5922.9134  | 0.0010  |
| 3 | 2 | 2 | 2 | 0 | 2 | 2 | 1 | 1 | 0 | 5924.4120  | 0.0012  |
| 3 | 2 | 2 | 3 | 0 | 2 | 2 | 1 | 3 | 0 | 5923.8776  | 0.0020  |
| 3 | 2 | 2 | 2 | 0 | 2 | 2 | 1 | 2 | 0 | 5922.9134  | 0.0008  |



|   |   |   |   |   |   |   |   |   |   |            |         |
|---|---|---|---|---|---|---|---|---|---|------------|---------|
| 4 | 0 | 4 | 5 | 0 | 3 | 0 | 3 | 4 | 0 | 7841.9984  | 0.0049  |
| 4 | 0 | 4 | 4 | 0 | 3 | 0 | 3 | 3 | 0 | 7841.9498  | 0.0060  |
| 4 | 0 | 4 | 3 | 0 | 3 | 0 | 3 | 2 | 0 | 7841.9116  | 0.0012  |
| 4 | 1 | 4 | 5 | 0 | 3 | 1 | 3 | 4 | 0 | 7530.0629  | 0.0113  |
| 4 | 1 | 4 | 4 | 0 | 3 | 1 | 3 | 3 | 0 | 7529.9133  | -0.0055 |
| 4 | 1 | 4 | 3 | 0 | 3 | 1 | 3 | 2 | 0 | 7529.9976  | 0.0120  |
| 4 | 1 | 3 | 5 | 0 | 3 | 1 | 2 | 4 | 0 | 8243.7968  | 0.0061  |
| 4 | 1 | 3 | 4 | 0 | 3 | 1 | 2 | 3 | 0 | 8243.6768  | 0.0047  |
| 4 | 1 | 3 | 3 | 0 | 3 | 1 | 2 | 2 | 0 | 8243.7796  | -0.0016 |
| 4 | 2 | 3 | 5 | 0 | 3 | 2 | 2 | 4 | 0 | 7893.8714  | 0.0080  |
| 4 | 2 | 3 | 4 | 0 | 3 | 2 | 2 | 3 | 0 | 7893.4584  | 0.0067  |
| 4 | 2 | 3 | 3 | 0 | 3 | 2 | 2 | 2 | 0 | 7893.9674  | -0.0017 |
| 4 | 2 | 2 | 5 | 0 | 3 | 2 | 1 | 4 | 0 | 7950.1063  | 0.0043  |
| 4 | 2 | 2 | 4 | 0 | 3 | 2 | 1 | 3 | 0 | 7949.7180  | 0.0007  |
| 4 | 2 | 2 | 3 | 0 | 3 | 2 | 1 | 2 | 0 | 7950.2015  | -0.0023 |
| 5 | 0 | 5 | 6 | 0 | 4 | 0 | 4 | 5 | 0 | 9761.2039  | 0.0036  |
| 5 | 0 | 5 | 5 | 0 | 4 | 0 | 4 | 4 | 0 | 9761.1537  | 0.0025  |
| 5 | 0 | 5 | 4 | 0 | 4 | 0 | 4 | 3 | 0 | 9761.1527  | 0.0002  |
| 5 | 0 | 5 | 5 | 0 | 4 | 0 | 4 | 5 | 0 | 9760.0742  | 0.0041  |
| 5 | 1 | 5 | 6 | 0 | 4 | 1 | 4 | 5 | 0 | 9402.5852  | 0.0028  |
| 5 | 1 | 5 | 5 | 0 | 4 | 1 | 4 | 4 | 0 | 9402.5064  | 0.0022  |
| 5 | 1 | 5 | 4 | 0 | 4 | 1 | 4 | 3 | 0 | 9402.5384  | 0.0049  |
| 5 | 1 | 4 | 6 | 0 | 4 | 1 | 3 | 5 | 0 | 10293.2227 | 0.0004  |
| 5 | 1 | 4 | 5 | 0 | 4 | 1 | 3 | 4 | 0 | 10293.1554 | 0.0024  |
| 5 | 2 | 4 | 6 | 0 | 4 | 2 | 3 | 5 | 0 | 9860.0908  | -0.0009 |
| 5 | 2 | 4 | 5 | 0 | 4 | 2 | 3 | 4 | 0 | 9859.8711  | -0.0018 |
| 5 | 2 | 4 | 4 | 0 | 4 | 2 | 3 | 3 | 0 | 9860.1149  | 0.0006  |
| 5 | 2 | 3 | 6 | 0 | 4 | 2 | 2 | 5 | 0 | 9971.5614  | 0.0054  |
| 5 | 2 | 3 | 5 | 0 | 4 | 2 | 2 | 4 | 0 | 9971.3707  | 0.0001  |
| 5 | 2 | 3 | 4 | 0 | 4 | 2 | 2 | 3 | 0 | 9971.5746  | -0.0002 |
| 5 | 3 | 3 | 6 | 0 | 4 | 3 | 2 | 5 | 0 | 9890.9200  | -0.0001 |
| 5 | 3 | 3 | 5 | 0 | 4 | 3 | 2 | 4 | 0 | 9890.4619  | -0.0022 |
| 5 | 3 | 3 | 4 | 0 | 4 | 3 | 2 | 3 | 0 | 9891.0346  | 0.0019  |
| 5 | 3 | 2 | 6 | 0 | 4 | 3 | 1 | 5 | 0 | 9893.2684  | -0.0006 |
| 5 | 3 | 2 | 5 | 0 | 4 | 3 | 1 | 4 | 0 | 9892.8176  | 0.0032  |
| 5 | 3 | 2 | 4 | 0 | 4 | 3 | 1 | 3 | 0 | 9893.3831  | 0.0018  |
| 6 | 0 | 6 | 7 | 0 | 5 | 0 | 5 | 6 | 0 | 11655.0243 | -0.0014 |
| 6 | 0 | 6 | 6 | 0 | 5 | 0 | 5 | 5 | 0 | 11654.9735 | -0.0020 |
| 6 | 0 | 6 | 5 | 0 | 5 | 0 | 5 | 4 | 0 | 11654.9921 | -0.0027 |
| 6 | 0 | 6 | 6 | 0 | 5 | 0 | 5 | 6 | 0 | 11653.8446 | -0.0007 |
| 6 | 1 | 6 | 7 | 0 | 5 | 1 | 5 | 6 | 0 | 11269.0754 | 0.0003  |
| 6 | 1 | 6 | 6 | 0 | 5 | 1 | 5 | 5 | 0 | 11269.0240 | 0.0021  |
| 6 | 1 | 6 | 5 | 0 | 5 | 1 | 5 | 4 | 0 | 11269.0381 | -0.0010 |
| 6 | 1 | 5 | 7 | 0 | 5 | 1 | 4 | 6 | 0 | 12334.3680 | -0.0014 |
| 6 | 1 | 5 | 6 | 0 | 5 | 1 | 4 | 5 | 0 | 12334.3203 | -0.0008 |
| 6 | 1 | 5 | 5 | 0 | 5 | 1 | 4 | 4 | 0 | 12334.3642 | 0.0081  |
| 6 | 2 | 5 | 7 | 0 | 5 | 2 | 4 | 6 | 0 | 11821.5804 | 0.0009  |
| 6 | 2 | 5 | 6 | 0 | 5 | 2 | 4 | 5 | 0 | 11821.4447 | -0.0014 |
| 6 | 2 | 5 | 5 | 0 | 5 | 2 | 4 | 4 | 0 | 11821.5804 | 0.0004  |
| 6 | 2 | 4 | 7 | 0 | 5 | 2 | 3 | 6 | 0 | 12013.5488 | 0.0009  |
| 6 | 2 | 4 | 6 | 0 | 5 | 2 | 3 | 5 | 0 | 12013.4536 | 0.0004  |
| 6 | 2 | 4 | 5 | 0 | 5 | 2 | 3 | 4 | 0 | 12013.5488 | 0.0037  |
| 6 | 3 | 4 | 7 | 0 | 5 | 3 | 3 | 6 | 0 | 11874.9966 | -0.0014 |
| 6 | 3 | 4 | 6 | 0 | 5 | 3 | 3 | 5 | 0 | 11874.7305 | -0.0016 |
| 6 | 3 | 4 | 5 | 0 | 5 | 3 | 3 | 4 | 0 | 11875.0390 | -0.0008 |
| 6 | 3 | 3 | 7 | 0 | 5 | 3 | 2 | 6 | 0 | 11881.2400 | -0.0059 |
| 6 | 3 | 3 | 6 | 0 | 5 | 3 | 2 | 5 | 0 | 11880.9828 | 0.0002  |
| 6 | 3 | 3 | 5 | 0 | 5 | 3 | 2 | 4 | 0 | 11881.2855 | -0.0018 |

|   |   |   |    |   |   |   |   |   |   |            |         |
|---|---|---|----|---|---|---|---|---|---|------------|---------|
| 6 | 4 | 3 | 7  | 0 | 5 | 4 | 2 | 6 | 0 | 11866.0338 | -0.0042 |
| 6 | 4 | 3 | 5  | 0 | 5 | 4 | 2 | 4 | 0 | 11866.1303 | -0.0087 |
| 6 | 4 | 2 | 7  | 0 | 5 | 4 | 1 | 6 | 0 | 11866.1020 | -0.0022 |
| 7 | 0 | 7 | 8  | 0 | 6 | 0 | 6 | 7 | 0 | 13521.6267 | -0.0001 |
| 7 | 0 | 7 | 7  | 0 | 6 | 0 | 6 | 6 | 0 | 13521.5740 | -0.0016 |
| 7 | 0 | 7 | 6  | 0 | 6 | 0 | 6 | 5 | 0 | 13521.6048 | -0.0003 |
| 7 | 1 | 7 | 8  | 0 | 6 | 1 | 6 | 7 | 0 | 13128.8715 | -0.0009 |
| 7 | 1 | 7 | 7  | 0 | 6 | 1 | 6 | 6 | 0 | 13128.8354 | 0.0031  |
| 7 | 1 | 7 | 6  | 0 | 6 | 1 | 6 | 5 | 0 | 13128.8354 | -0.0098 |
| 7 | 1 | 6 | 8  | 0 | 6 | 1 | 5 | 7 | 0 | 14364.9410 | 0.0006  |
| 7 | 1 | 6 | 7  | 0 | 6 | 1 | 5 | 6 | 0 | 14364.8969 | -0.0047 |
| 7 | 1 | 6 | 6  | 0 | 6 | 1 | 5 | 5 | 0 | 14364.9261 | -0.0034 |
| 7 | 2 | 6 | 8  | 0 | 6 | 2 | 5 | 7 | 0 | 13777.3848 | -0.0019 |
| 7 | 2 | 6 | 7  | 0 | 6 | 2 | 5 | 6 | 0 | 13777.2951 | -0.0019 |
| 7 | 2 | 6 | 6  | 0 | 6 | 2 | 5 | 5 | 0 | 13777.3848 | 0.0039  |
| 7 | 2 | 5 | 8  | 0 | 6 | 2 | 4 | 7 | 0 | 14076.9020 | 0.0000  |
| 7 | 2 | 5 | 7  | 0 | 6 | 2 | 4 | 6 | 0 | 14076.8517 | -0.0029 |
| 7 | 2 | 5 | 6  | 0 | 6 | 2 | 4 | 5 | 0 | 14076.9020 | 0.0087  |
| 8 | 0 | 8 | 9  | 0 | 7 | 0 | 7 | 8 | 0 | 15361.6500 | -0.0069 |
| 8 | 0 | 8 | 8  | 0 | 7 | 0 | 7 | 7 | 0 | 15361.6042 | -0.0016 |
| 8 | 0 | 8 | 7  | 0 | 7 | 0 | 7 | 6 | 0 | 15361.6392 | -0.0016 |
| 8 | 1 | 8 | 9  | 0 | 7 | 1 | 7 | 8 | 0 | 14981.5754 | -0.0039 |
| 8 | 1 | 8 | 8  | 0 | 7 | 1 | 7 | 7 | 0 | 14981.5377 | -0.0090 |
| 8 | 1 | 8 | 7  | 0 | 7 | 1 | 7 | 6 | 0 | 14981.5541 | -0.0040 |
| 8 | 1 | 7 | 9  | 0 | 7 | 1 | 6 | 8 | 0 | 16382.3199 | 0.0020  |
| 8 | 1 | 7 | 8  | 0 | 7 | 1 | 6 | 7 | 0 | 16382.2749 | -0.0085 |
| 8 | 1 | 7 | 7  | 0 | 7 | 1 | 6 | 6 | 0 | 16382.3095 | 0.0001  |
| 9 | 0 | 9 | 10 | 0 | 8 | 0 | 8 | 9 | 0 | 17178.3318 | -0.0128 |
| 9 | 0 | 9 | 9  | 0 | 8 | 0 | 8 | 8 | 0 | 17178.2882 | -0.0071 |
| 9 | 0 | 9 | 8  | 0 | 8 | 0 | 8 | 7 | 0 | 17178.3318 | -0.0001 |
| 2 | 1 | 2 | 2  | 0 | 1 | 0 | 1 | 1 | 0 | 7907.6832  | -0.0012 |
| 2 | 1 | 2 | 1  | 0 | 1 | 0 | 1 | 0 | 0 | 7906.6851  | 0.0119  |
| 3 | 1 | 3 | 2  | 0 | 2 | 0 | 2 | 1 | 0 | 9616.2413  | 0.0050  |
| 3 | 1 | 3 | 4  | 0 | 2 | 0 | 2 | 3 | 0 | 9616.4085  | 0.0072  |
| 3 | 1 | 3 | 3  | 0 | 2 | 0 | 2 | 2 | 0 | 9616.3099  | 0.0106  |
| 3 | 2 | 1 | 4  | 0 | 3 | 1 | 2 | 3 | 0 | 12175.2411 | -0.0022 |
| 3 | 2 | 1 | 3  | 0 | 3 | 1 | 2 | 2 | 0 | 12174.6935 | -0.0034 |
| 3 | 2 | 1 | 4  | 0 | 3 | 1 | 2 | 4 | 0 | 12174.8131 | -0.0016 |
| 3 | 2 | 1 | 3  | 0 | 3 | 1 | 2 | 3 | 0 | 12175.2753 | -0.0006 |
| 4 | 1 | 4 | 3  | 0 | 3 | 0 | 3 | 2 | 0 | 11245.2579 | 0.0029  |
| 4 | 1 | 4 | 4  | 0 | 3 | 0 | 3 | 3 | 0 | 11245.1302 | 0.0044  |
| 4 | 1 | 4 | 5  | 0 | 3 | 0 | 3 | 4 | 0 | 11245.3098 | 0.0050  |
| 2 | 2 | 0 | 3  | 0 | 2 | 1 | 1 | 3 | 0 | 12416.4362 | 0.0020  |
| 2 | 2 | 0 | 2  | 0 | 2 | 1 | 1 | 2 | 0 | 12417.5807 | 0.0022  |
| 2 | 2 | 0 | 1  | 0 | 2 | 1 | 1 | 1 | 0 | 12415.7984 | 0.0004  |
| 2 | 2 | 0 | 3  | 0 | 1 | 1 | 1 | 2 | 0 | 16722.8817 | -0.0010 |
| 2 | 2 | 0 | 2  | 0 | 1 | 1 | 1 | 1 | 0 | 16723.7083 | 0.0069  |
| 2 | 2 | 1 | 3  | 0 | 1 | 1 | 0 | 2 | 0 | 16538.7077 | 0.0015  |
| 2 | 2 | 1 | 2  | 0 | 1 | 1 | 0 | 1 | 0 | 16538.9295 | 0.0017  |
| 2 | 2 | 1 | 1  | 0 | 1 | 1 | 0 | 0 | 0 | 16539.2852 | 0.0017  |
| 2 | 2 | 1 | 2  | 0 | 2 | 1 | 2 | 2 | 0 | 12948.2388 | -0.0059 |
| 2 | 2 | 1 | 1  | 0 | 2 | 1 | 2 | 1 | 0 | 12945.5056 | -0.0045 |
| 3 | 2 | 2 | 4  | 0 | 3 | 1 | 3 | 4 | 0 | 13217.9755 | 0.0013  |
| 3 | 2 | 2 | 3  | 0 | 3 | 1 | 3 | 3 | 0 | 13219.0507 | -0.0013 |
| 3 | 2 | 2 | 2  | 0 | 3 | 1 | 3 | 2 | 0 | 13217.5942 | -0.0028 |
| 4 | 2 | 3 | 5  | 0 | 4 | 1 | 4 | 5 | 0 | 13581.7896 | 0.0036  |
| 4 | 2 | 3 | 4  | 0 | 4 | 1 | 4 | 4 | 0 | 13582.5894 | 0.0046  |
| 4 | 2 | 3 | 3  | 0 | 4 | 1 | 4 | 3 | 0 | 13581.5814 | 0.0007  |

|   |   |   |   |   |   |   |   |   |   |            |         |
|---|---|---|---|---|---|---|---|---|---|------------|---------|
| 4 | 2 | 2 | 3 | 0 | 4 | 1 | 3 | 3 | 0 | 11881.0773 | 0.0014  |
| 5 | 1 | 5 | 5 | 0 | 4 | 0 | 4 | 4 | 0 | 12805.6893 | 0.0031  |
| 5 | 1 | 5 | 4 | 0 | 4 | 0 | 4 | 3 | 0 | 12805.8855 | 0.0073  |
| 5 | 1 | 5 | 6 | 0 | 4 | 0 | 4 | 5 | 0 | 12805.8929 | -0.0007 |
| 5 | 0 | 5 | 4 | 0 | 4 | 1 | 4 | 3 | 0 | 6357.8170  | 0.0091  |
| 5 | 0 | 5 | 5 | 0 | 4 | 1 | 4 | 4 | 0 | 6357.9635  | -0.0056 |
| 5 | 0 | 5 | 6 | 0 | 4 | 1 | 4 | 5 | 0 | 6357.8810  | -0.0078 |
| 5 | 2 | 4 | 6 | 0 | 5 | 1 | 5 | 6 | 0 | 14039.2921 | -0.0033 |
| 5 | 2 | 4 | 5 | 0 | 5 | 1 | 5 | 5 | 0 | 14039.9487 | -0.0047 |
| 5 | 2 | 4 | 4 | 0 | 5 | 1 | 5 | 4 | 0 | 14039.1533 | -0.0081 |
| 5 | 2 | 3 | 6 | 0 | 5 | 1 | 4 | 6 | 0 | 11559.4566 | -0.0031 |
| 5 | 2 | 3 | 5 | 0 | 5 | 1 | 4 | 5 | 0 | 11559.5360 | -0.0027 |
| 5 | 2 | 3 | 4 | 0 | 5 | 1 | 4 | 4 | 0 | 11559.4430 | -0.0006 |
| 6 | 1 | 6 | 6 | 0 | 5 | 0 | 5 | 5 | 0 | 14313.5556 | -0.0013 |
| 6 | 1 | 6 | 5 | 0 | 5 | 0 | 5 | 4 | 0 | 14313.7698 | 0.0050  |
| 6 | 1 | 6 | 7 | 0 | 5 | 0 | 5 | 6 | 0 | 14313.7698 | 0.0013  |
| 6 | 0 | 6 | 5 | 0 | 5 | 1 | 5 | 4 | 0 | 8610.2702  | 0.0010  |
| 6 | 0 | 6 | 6 | 0 | 5 | 1 | 5 | 5 | 0 | 8610.4417  | 0.0012  |
| 6 | 0 | 6 | 7 | 0 | 5 | 1 | 5 | 6 | 0 | 8610.3332  | 0.0008  |
| 7 | 1 | 7 | 8 | 0 | 6 | 0 | 6 | 7 | 0 | 15787.6124 | -0.0027 |
| 7 | 1 | 7 | 7 | 0 | 6 | 0 | 6 | 6 | 0 | 15787.4128 | -0.0008 |
| 7 | 1 | 7 | 6 | 0 | 6 | 0 | 6 | 5 | 0 | 15787.6124 | -0.0028 |
| 7 | 0 | 7 | 8 | 0 | 6 | 1 | 6 | 7 | 0 | 10862.8797 | -0.0044 |
| 7 | 0 | 7 | 7 | 0 | 6 | 1 | 6 | 6 | 0 | 10862.9950 | 0.0007  |
| 7 | 0 | 7 | 6 | 0 | 6 | 1 | 6 | 5 | 0 | 10862.8335 | -0.0017 |

**Table S5.** Observed rotational transitions and residuals (in MHz) for  $^{34}\text{S1}$  isotopologue of isomer **I** of the thiazole-formaldehyde complex.

| $J'$ | $K_a'$ | $K_c'$ | $F'$ | $\nu'$ | $J''$ | $K_a''$ | $K_c''$ | $F''$ | $\nu''$ | Obs.       | Obs.-Cal. |
|------|--------|--------|------|--------|-------|---------|---------|-------|---------|------------|-----------|
| 3    | 0      | 3      | 4    | 1      | 2     | 0       | 2       | 3     | 1       | 5827.2512  | -0.0014   |
| 3    | 0      | 3      | 3    | 1      | 2     | 0       | 2       | 2     | 1       | 5827.2043  | 0.0074    |
| 3    | 0      | 3      | 2    | 1      | 2     | 0       | 2       | 1     | 1       | 5827.0652  | -0.0063   |
| 4    | 0      | 4      | 5    | 1      | 3     | 0       | 3       | 4     | 1       | 7743.3515  | -0.0057   |
| 4    | 0      | 4      | 4    | 1      | 3     | 0       | 3       | 3     | 1       | 7743.3010  | -0.0062   |
| 4    | 0      | 4      | 3    | 1      | 3     | 0       | 3       | 2     | 1       | 7743.2658  | -0.0084   |
| 4    | 1      | 4      | 5    | 1      | 3     | 1       | 3       | 4     | 1       | 7434.1682  | 0.0022    |
| 4    | 1      | 4      | 4    | 1      | 3     | 1       | 3       | 3     | 1       | 7434.0240  | -0.0092   |
| 4    | 1      | 4      | 3    | 1      | 3     | 1       | 3       | 2     | 1       | 7434.0993  | -0.0006   |
| 4    | 1      | 3      | 5    | 1      | 3     | 1       | 2       | 4     | 1       | 8142.7811  | -0.0049   |
| 4    | 1      | 3      | 4    | 1      | 3     | 1       | 2       | 3     | 1       | 8142.6626  | -0.0047   |
| 4    | 1      | 3      | 3    | 1      | 3     | 1       | 2       | 2     | 1       | 8142.7811  | 0.0044    |
| 5    | 0      | 5      | 6    | 1      | 4     | 0       | 4       | 5     | 1       | 9637.7447  | -0.0064   |
| 5    | 0      | 5      | 5    | 1      | 4     | 0       | 4       | 4     | 1       | 9637.7002  | -0.0014   |
| 5    | 0      | 5      | 4    | 1      | 4     | 0       | 4       | 3     | 1       | 9637.7002  | -0.0031   |
| 5    | 1      | 5      | 6    | 1      | 4     | 1       | 4       | 5     | 1       | 9282.6867  | -0.0033   |
| 5    | 1      | 5      | 5    | 1      | 4     | 1       | 4       | 4     | 1       | 9282.6073  | -0.0045   |
| 5    | 1      | 5      | 4    | 1      | 4     | 1       | 4       | 3     | 1       | 9282.6425  | 0.0012    |
| 5    | 1      | 4      | 6    | 1      | 4     | 1       | 3       | 5     | 1       | 10166.9059 | -0.0009   |
| 5    | 1      | 4      | 5    | 1      | 4     | 1       | 3       | 4     | 1       | 10166.8350 | -0.0024   |
| 5    | 1      | 4      | 4    | 1      | 4     | 1       | 3       | 3     | 1       | 10166.8932 | 0.0015    |
| 5    | 2      | 4      | 6    | 1      | 4     | 2       | 3       | 5     | 1       | 9737.0425  | 0.0000    |
| 5    | 2      | 4      | 5    | 1      | 4     | 2       | 3       | 4     | 1       | 9736.8219  | -0.0018   |
| 5    | 2      | 4      | 4    | 1      | 4     | 2       | 3       | 3     | 1       | 9737.0668  | 0.0017    |
| 5    | 2      | 3      | 6    | 1      | 4     | 2       | 2       | 5     | 1       | 9848.9631  | 0.0009    |
| 5    | 2      | 3      | 5    | 1      | 4     | 2       | 2       | 4     | 1       | 9848.7783  | 0.0012    |
| 5    | 2      | 3      | 4    | 1      | 4     | 2       | 2       | 3     | 1       | 9848.9786  | -0.0024   |
| 6    | 0      | 6      | 7    | 1      | 5     | 0       | 5       | 6     | 1       | 11506.7181 | 0.0017    |
| 6    | 0      | 6      | 6    | 1      | 5     | 0       | 5       | 5     | 1       | 11506.6628 | -0.0029   |
| 6    | 0      | 6      | 5    | 1      | 5     | 0       | 5       | 4     | 1       | 11506.6824 | -0.0029   |
| 6    | 1      | 6      | 7    | 1      | 5     | 1       | 5       | 6     | 1       | 11125.1630 | 0.0014    |
| 6    | 1      | 6      | 6    | 1      | 5     | 1       | 5       | 5     | 1       | 11125.1087 | 0.0004    |
| 6    | 1      | 6      | 5    | 1      | 5     | 1       | 5       | 4     | 1       | 11125.1239 | -0.0016   |
| 6    | 1      | 5      | 7    | 1      | 5     | 1       | 4       | 6     | 1       | 12182.6930 | -0.0002   |
| 6    | 1      | 5      | 6    | 1      | 5     | 1       | 4       | 5     | 1       | 12182.6473 | 0.0025    |
| 6    | 1      | 5      | 5    | 1      | 5     | 1       | 4       | 4     | 1       | 12182.6875 | 0.0076    |
| 7    | 0      | 7      | 8    | 1      | 6     | 0       | 6       | 7     | 1       | 13348.4842 | 0.0092    |
| 7    | 0      | 7      | 7    | 1      | 6     | 0       | 6       | 6     | 1       | 13348.4310 | 0.0076    |
| 7    | 0      | 7      | 6    | 1      | 6     | 0       | 6       | 5     | 1       | 13348.4616 | 0.0083    |
| 2    | 2      | 0      | 3    | 1      | 2     | 1       | 1       | 3     | 1       | 12182.4268 | -0.0051   |
| 2    | 2      | 1      | 3    | 1      | 1     | 1       | 0       | 2     | 1       | 16254.2066 | 0.0022    |
| 2    | 2      | 1      | 2    | 1      | 1     | 1       | 0       | 1     | 1       | 16254.4285 | 0.0025    |
| 3    | 0      | 3      | 4    | 0      | 2     | 0       | 2       | 3     | 0       | 5826.5422  | 0.0080    |
| 3    | 0      | 3      | 3    | 0      | 2     | 0       | 2       | 2     | 0       | 5826.4684  | -0.0099   |
| 4    | 0      | 4      | 5    | 0      | 3     | 0       | 3       | 4     | 0       | 7742.3935  | -0.0003   |
| 4    | 0      | 4      | 4    | 0      | 3     | 0       | 3       | 3     | 0       | 7742.3440  | 0.0001    |
| 4    | 0      | 4      | 3    | 0      | 3     | 0       | 3       | 2     | 0       | 7742.3064  | -0.0044   |
| 4    | 1      | 4      | 5    | 0      | 3     | 1       | 3       | 4     | 0       | 7433.1712  | 0.0011    |
| 4    | 1      | 4      | 4    | 0      | 3     | 1       | 3       | 3     | 0       | 7433.0378  | 0.0004    |
| 4    | 1      | 3      | 5    | 0      | 3     | 1       | 2       | 4     | 0       | 8141.8739  | 0.0000    |
| 4    | 1      | 3      | 4    | 0      | 3     | 1       | 2       | 3     | 0       | 8141.7516  | -0.0035   |
| 4    | 1      | 3      | 3    | 0      | 3     | 1       | 2       | 2     | 0       | 8141.8739  | 0.0094    |
| 5    | 0      | 5      | 6    | 0      | 4     | 0       | 4       | 5     | 0       | 9636.5357  | -0.0026   |
| 5    | 0      | 5      | 5    | 0      | 4     | 0       | 4       | 4     | 0       | 9636.4873  | -0.0016   |
| 5    | 0      | 5      | 4    | 0      | 4     | 0       | 4       | 3     | 0       | 9636.4873  | -0.0033   |

|   |   |   |   |   |   |   |   |   |   |            |         |
|---|---|---|---|---|---|---|---|---|---|------------|---------|
| 5 | 1 | 5 | 6 | 0 | 4 | 1 | 4 | 5 | 0 | 9281.4460  | 0.0028  |
| 5 | 1 | 5 | 5 | 0 | 4 | 1 | 4 | 4 | 0 | 9281.3661  | 0.0011  |
| 5 | 1 | 5 | 4 | 0 | 4 | 1 | 4 | 3 | 0 | 9281.3901  | -0.0042 |
| 5 | 1 | 4 | 6 | 0 | 4 | 1 | 3 | 5 | 0 | 10165.7625 | -0.0016 |
| 5 | 1 | 4 | 5 | 0 | 4 | 1 | 3 | 4 | 0 | 10165.6953 | 0.0005  |
| 6 | 0 | 6 | 7 | 0 | 5 | 0 | 5 | 6 | 0 | 11505.2500 | 0.0004  |
| 6 | 0 | 6 | 6 | 0 | 5 | 0 | 5 | 5 | 0 | 11505.2002 | 0.0012  |
| 6 | 0 | 6 | 5 | 0 | 5 | 0 | 5 | 4 | 0 | 11505.2132 | -0.0054 |
| 6 | 1 | 6 | 7 | 0 | 5 | 1 | 5 | 6 | 0 | 11123.6661 | 0.0035  |
| 6 | 1 | 6 | 6 | 0 | 5 | 1 | 5 | 5 | 0 | 11123.6075 | -0.0016 |
| 7 | 0 | 7 | 8 | 0 | 6 | 0 | 6 | 7 | 0 | 13346.7514 | 0.0018  |
| 7 | 0 | 7 | 7 | 0 | 6 | 0 | 6 | 6 | 0 | 13346.6981 | 0.0001  |
| 7 | 0 | 7 | 6 | 0 | 6 | 0 | 6 | 5 | 0 | 13346.7310 | 0.0031  |

**Table S6.** Observed rotational transitions and residuals (in MHz) for  $^{13}\text{C4}$  isotopologue of isomer **I** of the thiazole-formaldehyde complex.

| $J'$ | $K_a'$ | $K_c'$ | $F'$ | $v'$ | $J''$ | $K_a''$ | $K_c''$ | $F''$ | $v''$ | Obs.       | Obs.-Cal. |
|------|--------|--------|------|------|-------|---------|---------|-------|-------|------------|-----------|
| 3    | 0      | 3      | 4    | 1    | 2     | 0       | 2       | 3     | 1     | 5878.8156  | -0.0055   |
| 3    | 0      | 3      | 3    | 1    | 2     | 0       | 2       | 2     | 1     | 5878.7616  | -0.0030   |
| 4    | 0      | 4      | 5    | 1    | 3     | 0       | 3       | 4     | 1     | 7810.7249  | 0.0002    |
| 4    | 0      | 4      | 4    | 1    | 3     | 0       | 3       | 3     | 1     | 7810.6714  | -0.0025   |
| 4    | 1      | 4      | 5    | 1    | 3     | 1       | 3       | 4     | 1     | 7495.9317  | -0.0077   |
| 4    | 1      | 4      | 4    | 1    | 3     | 1       | 3       | 3     | 1     | 7495.8051  | -0.0014   |
| 5    | 0      | 5      | 6    | 1    | 4     | 0       | 4       | 5     | 1     | 9719.8176  | -0.0025   |
| 5    | 0      | 5      | 5    | 1    | 4     | 0       | 4       | 4     | 1     | 9719.7705  | 0.0006    |
| 5    | 0      | 5      | 4    | 1    | 4     | 0       | 4       | 3     | 1     | 9719.7705  | -0.0020   |
| 5    | 1      | 5      | 6    | 1    | 4     | 1       | 4       | 5     | 1     | 9359.3950  | -0.0029   |
| 5    | 1      | 5      | 5    | 1    | 4     | 1       | 4       | 4     | 1     | 9359.3204  | 0.0008    |
| 5    | 1      | 5      | 4    | 1    | 4     | 1       | 4       | 3     | 1     | 9359.3513  | 0.0021    |
| 5    | 1      | 4      | 6    | 1    | 4     | 1       | 3       | 5     | 1     | 10263.4761 | 0.0037    |
| 5    | 1      | 4      | 5    | 1    | 4     | 1       | 3       | 4     | 1     | 10263.3983 | -0.0044   |
| 5    | 1      | 4      | 4    | 1    | 4     | 1       | 3       | 3     | 1     | 10263.4622 | 0.0049    |
| 6    | 0      | 6      | 7    | 1    | 5     | 0       | 5       | 6     | 1     | 11602.3086 | 0.0021    |
| 6    | 0      | 6      | 6    | 1    | 5     | 0       | 5       | 5     | 1     | 11602.2540 | -0.0009   |
| 6    | 0      | 6      | 5    | 1    | 5     | 0       | 5       | 4     | 1     | 11602.2760 | 0.0004    |
| 6    | 1      | 6      | 7    | 1    | 5     | 1       | 5       | 6     | 1     | 11216.5202 | 0.0057    |
| 6    | 1      | 6      | 6    | 1    | 5     | 1       | 5       | 5     | 1     | 11216.4673 | 0.0063    |
| 6    | 1      | 6      | 5    | 1    | 5     | 1       | 5       | 4     | 1     | 11216.4760 | -0.0025   |

**Table S7.** Observed rotational transitions and residuals (in MHz) for  $^{13}\text{C5}$  isotopologue of isomer **I** of the thiazole-formaldehyde complex.

| $J'$ | $K_a'$ | $K_c'$ | $F'$ | $v'$ | $J''$ | $K_a''$ | $K_c''$ | $F''$ | $v''$ | Obs.       | Obs.-Cal. |
|------|--------|--------|------|------|-------|---------|---------|-------|-------|------------|-----------|
| 3    | 0      | 3      | 4    | 1    | 2     | 0       | 2       | 3     | 1     | 5847.5030  | -0.0043   |
| 3    | 0      | 3      | 3    | 1    | 2     | 0       | 2       | 2     | 1     | 5847.4558  | 0.0039    |
| 4    | 0      | 4      | 5    | 1    | 3     | 0       | 3       | 4     | 1     | 7771.0492  | -0.0005   |
| 4    | 0      | 4      | 4    | 1    | 3     | 0       | 3       | 3     | 1     | 7770.9968  | -0.0034   |
| 4    | 0      | 4      | 3    | 1    | 3     | 0       | 3       | 2     | 1     | 7770.9660  | -0.0006   |
| 4    | 1      | 4      | 5    | 1    | 3     | 1       | 3       | 4     | 1     | 7462.8416  | -0.0019   |
| 4    | 1      | 4      | 4    | 1    | 3     | 1       | 3       | 3     | 1     | 7462.7087  | -0.0021   |
| 5    | 0      | 5      | 6    | 1    | 4     | 0       | 4       | 5     | 1     | 9673.4207  | 0.0036    |
| 5    | 0      | 5      | 5    | 1    | 4     | 0       | 4       | 4     | 1     | 9673.3667  | -0.0014   |
| 5    | 0      | 5      | 4    | 1    | 4     | 0       | 4       | 3     | 1     | 9673.3667  | -0.0025   |
| 5    | 1      | 5      | 6    | 1    | 4     | 1       | 4       | 5     | 1     | 9318.7862  | 0.0003    |
| 5    | 1      | 5      | 5    | 1    | 4     | 1       | 4       | 4     | 1     | 9318.7119  | 0.0041    |
| 5    | 1      | 4      | 6    | 1    | 4     | 1       | 3       | 5     | 1     | 10197.6532 | 0.0080    |
| 5    | 1      | 4      | 5    | 1    | 4     | 1       | 3       | 4     | 1     | 10197.5730 | -0.0029   |
| 5    | 1      | 4      | 4    | 1    | 4     | 1       | 3       | 3     | 1     | 10197.6260 | -0.0039   |
| 6    | 0      | 6      | 7    | 1    | 5     | 0       | 5       | 6     | 1     | 11550.9247 | 0.0060    |
| 6    | 0      | 6      | 6    | 1    | 5     | 0       | 5       | 5     | 1     | 11550.8728 | 0.0041    |
| 6    | 0      | 6      | 5    | 1    | 5     | 0       | 5       | 4     | 1     | 11550.8970 | 0.0093    |
| 6    | 1      | 6      | 7    | 1    | 5     | 1       | 5       | 6     | 1     | 11168.8212 | 0.0065    |
| 6    | 1      | 6      | 6    | 1    | 5     | 1       | 5       | 5     | 1     | 11168.7629 | 0.0014    |
| 6    | 1      | 6      | 5    | 1    | 5     | 1       | 5       | 4     | 1     | 11168.7706 | -0.0080   |

**Table S8.** Observed rotational transitions and residuals (in MHz) for  $^{18}\text{O}_9$  isotopologue of isomer **I** of the thiazole-formaldehyde complex.

| $J'$ | $K_a'$ | $K_c'$ | $F'$ | $v'$ | $J''$ | $K_a''$ | $K_c''$ | $F''$ | $v''$ | Obs.       | Obs.–Cal. |
|------|--------|--------|------|------|-------|---------|---------|-------|-------|------------|-----------|
| 3    | 0      | 3      | 4    | 1    | 2     | 0       | 2       | 3     | 1     | 5681.0231  | -0.0015   |
| 3    | 0      | 3      | 3    | 1    | 2     | 0       | 2       | 2     | 1     | 5680.9609  | -0.0092   |
| 3    | 0      | 3      | 2    | 1    | 2     | 0       | 2       | 1     | 1     | 5680.8397  | -0.0034   |
| 4    | 0      | 4      | 5    | 1    | 3     | 0       | 3       | 4     | 1     | 7551.6406  | -0.0056   |
| 4    | 0      | 4      | 4    | 1    | 3     | 0       | 3       | 3     | 1     | 7551.5934  | -0.0046   |
| 4    | 0      | 4      | 3    | 1    | 3     | 0       | 3       | 2     | 1     | 7551.5561  | -0.0068   |
| 4    | 1      | 4      | 5    | 1    | 3     | 1       | 3       | 4     | 1     | 7257.1834  | -0.0035   |
| 4    | 1      | 4      | 4    | 1    | 3     | 1       | 3       | 3     | 1     | 7257.0536  | -0.0009   |
| 4    | 1      | 4      | 3    | 1    | 3     | 1       | 3       | 2     | 1     | 7257.1159  | -0.0049   |
| 4    | 1      | 3      | 5    | 1    | 3     | 1       | 2       | 4     | 1     | 7925.0880  | -0.0040   |
| 4    | 1      | 3      | 4    | 1    | 3     | 1       | 2       | 3     | 1     | 7924.9713  | -0.0026   |
| 4    | 1      | 3      | 3    | 1    | 3     | 1       | 2       | 2     | 1     | 7925.0880  | 0.0054    |
| 5    | 0      | 5      | 6    | 1    | 4     | 0       | 4       | 5     | 1     | 9403.1458  | -0.0074   |
| 5    | 0      | 5      | 5    | 1    | 4     | 0       | 4       | 4     | 1     | 9403.0959  | -0.0100   |
| 5    | 0      | 5      | 4    | 1    | 4     | 0       | 4       | 3     | 1     | 9403.0959  | -0.0093   |
| 5    | 1      | 5      | 6    | 1    | 4     | 1       | 4       | 5     | 1     | 9062.6616  | -0.0029   |
| 5    | 1      | 5      | 5    | 1    | 4     | 1       | 4       | 4     | 1     | 9062.5851  | -0.0017   |
| 5    | 1      | 5      | 4    | 1    | 4     | 1       | 4       | 3     | 1     | 9062.6154  | -0.0002   |
| 5    | 1      | 4      | 6    | 1    | 4     | 1       | 3       | 5     | 1     | 9896.2756  | -0.0012   |
| 5    | 1      | 4      | 5    | 1    | 4     | 1       | 3       | 4     | 1     | 9896.2040  | -0.0041   |
| 5    | 1      | 4      | 4    | 1    | 4     | 1       | 3       | 3     | 1     | 9896.2593  | -0.0023   |
| 5    | 2      | 4      | 6    | 1    | 4     | 2       | 3       | 5     | 1     | 9490.1738  | 0.0027    |
| 5    | 2      | 4      | 5    | 1    | 4     | 2       | 3       | 4     | 1     | 9489.9585  | 0.0059    |
| 5    | 2      | 4      | 4    | 1    | 4     | 2       | 3       | 3     | 1     | 9490.1961  | 0.0026    |
| 5    | 2      | 3      | 6    | 1    | 4     | 2       | 2       | 5     | 1     | 9588.2420  | 0.0080    |
| 5    | 2      | 3      | 5    | 1    | 4     | 2       | 2       | 4     | 1     | 9588.0557  | 0.0086    |
| 5    | 2      | 3      | 4    | 1    | 4     | 2       | 2       | 3     | 1     | 9588.2616  | 0.0086    |
| 6    | 0      | 6      | 7    | 1    | 5     | 0       | 5       | 6     | 1     | 11232.0632 | -0.0090   |
| 6    | 0      | 6      | 6    | 1    | 5     | 0       | 5       | 5     | 1     | 11232.0142 | -0.0096   |
| 6    | 0      | 6      | 5    | 1    | 5     | 0       | 5       | 4     | 1     | 11232.0326 | -0.0084   |
| 6    | 1      | 6      | 7    | 1    | 5     | 1       | 5       | 6     | 1     | 10862.7793 | 0.0009    |
| 6    | 1      | 6      | 6    | 1    | 5     | 1       | 5       | 5     | 1     | 10862.7279 | 0.0023    |
| 6    | 1      | 6      | 5    | 1    | 5     | 1       | 5       | 4     | 1     | 10862.7433 | 0.0009    |
| 6    | 1      | 5      | 7    | 1    | 5     | 1       | 4       | 6     | 1     | 11860.2404 | 0.0001    |
| 6    | 1      | 5      | 6    | 1    | 5     | 1       | 4       | 5     | 1     | 11860.1868 | -0.0059   |
| 6    | 2      | 5      | 7    | 1    | 5     | 2       | 4       | 6     | 1     | 11378.9436 | 0.0094    |
| 6    | 2      | 5      | 6    | 1    | 5     | 2       | 4       | 5     | 1     | 11378.8100 | 0.0088    |
| 6    | 2      | 5      | 5    | 1    | 5     | 2       | 4       | 4     | 1     | 11378.9436 | 0.0090    |
| 6    | 2      | 4      | 7    | 1    | 5     | 2       | 3       | 6     | 1     | 11548.1188 | -0.0102   |
| 6    | 2      | 4      | 6    | 1    | 5     | 2       | 3       | 5     | 1     | 11548.0239 | -0.0089   |
| 6    | 2      | 4      | 5    | 1    | 5     | 2       | 3       | 4     | 1     | 11548.1188 | -0.0074   |
| 7    | 0      | 7      | 8    | 1    | 6     | 0       | 6       | 7     | 1     | 13036.4399 | -0.0090   |
| 7    | 0      | 7      | 7    | 1    | 6     | 0       | 6       | 6     | 1     | 13036.3887 | -0.0108   |
| 7    | 0      | 7      | 6    | 1    | 6     | 0       | 6       | 5     | 1     | 13036.4209 | -0.0063   |
| 7    | 1      | 7      | 8    | 1    | 6     | 1       | 6       | 7     | 1     | 12656.9208 | 0.0089    |
| 7    | 1      | 7      | 7    | 1    | 6     | 1       | 6       | 6     | 1     | 12656.8846 | 0.0124    |
| 7    | 1      | 7      | 6    | 1    | 6     | 1       | 6       | 5     | 1     | 12656.8846 | 0.0000    |
| 7    | 1      | 6      | 8    | 1    | 6     | 1       | 5       | 7     | 1     | 13815.0208 | 0.0075    |
| 7    | 1      | 6      | 7    | 1    | 6     | 1       | 5       | 6     | 1     | 13814.9829 | 0.0073    |
| 7    | 1      | 6      | 6    | 1    | 6     | 1       | 5       | 5     | 1     | 13815.0124 | 0.0100    |
| 8    | 0      | 8      | 9    | 1    | 7     | 0       | 7       | 8     | 1     | 14816.3851 | -0.0021   |
| 8    | 0      | 8      | 8    | 1    | 7     | 0       | 7       | 7     | 1     | 14816.3341 | -0.0035   |
| 8    | 0      | 8      | 7    | 1    | 7     | 0       | 7       | 6     | 1     | 14816.3710 | 0.0000    |
| 8    | 1      | 8      | 9    | 1    | 7     | 1       | 7       | 8     | 1     | 14444.6706 | 0.0005    |



|   |   |   |   |   |   |   |   |   |   |            |         |
|---|---|---|---|---|---|---|---|---|---|------------|---------|
| 9 | 0 | 9 | 0 | 1 | 8 | 0 | 8 | 9 | 1 | 16574.2318 | 0.0068  |
| 9 | 0 | 9 | 9 | 1 | 8 | 0 | 8 | 8 | 1 | 16574.1859 | 0.0092  |
| 9 | 0 | 9 | 8 | 1 | 8 | 0 | 8 | 7 | 1 | 16574.2223 | 0.0099  |
| 3 | 0 | 3 | 4 | 0 | 2 | 0 | 2 | 3 | 0 | 5680.3311  | 0.0009  |
| 3 | 0 | 3 | 3 | 0 | 2 | 0 | 2 | 2 | 0 | 5680.2687  | -0.0069 |
| 4 | 0 | 4 | 5 | 0 | 3 | 0 | 3 | 4 | 0 | 7550.7095  | -0.0044 |
| 4 | 0 | 4 | 4 | 0 | 3 | 0 | 3 | 3 | 0 | 7550.6610  | -0.0047 |
| 4 | 0 | 4 | 3 | 0 | 3 | 0 | 3 | 2 | 0 | 7550.6250  | -0.0056 |
| 4 | 1 | 4 | 5 | 0 | 3 | 1 | 3 | 4 | 0 | 7256.2283  | -0.0009 |
| 4 | 1 | 4 | 4 | 0 | 3 | 1 | 3 | 3 | 0 | 7256.0914  | -0.0055 |
| 4 | 1 | 4 | 3 | 0 | 3 | 1 | 3 | 2 | 0 | 7256.1589  | -0.0043 |
| 4 | 1 | 3 | 5 | 0 | 3 | 1 | 2 | 4 | 0 | 7924.2049  | -0.0020 |
| 4 | 1 | 3 | 4 | 0 | 3 | 1 | 2 | 3 | 0 | 7924.0893  | 0.0005  |
| 4 | 1 | 3 | 3 | 0 | 3 | 1 | 2 | 2 | 0 | 7924.2049  | 0.0075  |
| 5 | 0 | 5 | 6 | 0 | 4 | 0 | 4 | 5 | 0 | 9401.9761  | -0.0020 |
| 5 | 0 | 5 | 5 | 0 | 4 | 0 | 4 | 4 | 0 | 9401.9271  | -0.0037 |
| 5 | 0 | 5 | 4 | 0 | 4 | 0 | 4 | 3 | 0 | 9401.9271  | -0.0031 |
| 5 | 1 | 5 | 6 | 0 | 4 | 1 | 4 | 5 | 0 | 9061.4654  | 0.0002  |
| 5 | 1 | 5 | 5 | 0 | 4 | 1 | 4 | 4 | 0 | 9061.3886  | 0.0011  |
| 5 | 1 | 5 | 4 | 0 | 4 | 1 | 4 | 3 | 0 | 9061.4163  | 0.0000  |
| 5 | 1 | 4 | 6 | 0 | 4 | 1 | 3 | 5 | 0 | 9895.1650  | -0.0025 |
| 5 | 1 | 4 | 5 | 0 | 4 | 1 | 3 | 4 | 0 | 9895.1004  | 0.0016  |
| 6 | 0 | 6 | 7 | 0 | 5 | 0 | 5 | 6 | 0 | 11230.6511 | 0.0022  |
| 6 | 0 | 6 | 6 | 0 | 5 | 0 | 5 | 5 | 0 | 11230.5993 | -0.0011 |
| 6 | 0 | 6 | 5 | 0 | 5 | 0 | 5 | 4 | 0 | 11230.6128 | -0.0048 |
| 6 | 1 | 6 | 7 | 0 | 5 | 1 | 5 | 6 | 0 | 10861.3420 | 0.0061  |
| 6 | 1 | 6 | 6 | 0 | 5 | 1 | 5 | 5 | 0 | 10861.2851 | 0.0019  |
| 6 | 1 | 6 | 5 | 0 | 5 | 1 | 5 | 4 | 0 | 10861.3051 | 0.0052  |
| 6 | 1 | 5 | 7 | 0 | 5 | 1 | 4 | 6 | 0 | 11858.9070 | 0.0023  |
| 6 | 1 | 5 | 6 | 0 | 5 | 1 | 4 | 5 | 0 | 11858.8589 | 0.0018  |
| 7 | 0 | 7 | 8 | 0 | 6 | 0 | 6 | 7 | 0 | 13034.7740 | 0.0019  |
| 7 | 0 | 7 | 7 | 0 | 6 | 0 | 6 | 6 | 0 | 13034.7221 | -0.0005 |
| 7 | 0 | 7 | 6 | 0 | 6 | 0 | 6 | 5 | 0 | 13034.7545 | 0.0042  |

**Table S9.** Observed rotational transitions and residuals (in MHz) for  $^{13}\text{C}10$  isotopologue of isomer **I** of the thiazole-formaldehyde complex.

| $J'$ | $K_a'$ | $K_c'$ | $F'$ | $\nu'$ | $J''$ | $K_a''$ | $K_c''$ | $F',$ | $\nu''$ | Obs.       | Obs.-Cal. |
|------|--------|--------|------|--------|-------|---------|---------|-------|---------|------------|-----------|
| 4    | 0      | 4      | 5    | 1      | 3     | 0       | 3       | 4     | 1       | 7700.5684  | -0.0054   |
| 4    | 0      | 4      | 4    | 1      | 3     | 0       | 3       | 3     | 1       | 7700.5192  | -0.0058   |
| 4    | 0      | 4      | 3    | 1      | 3     | 0       | 3       | 2     | 1       | 7700.4915  | 0.0008    |
| 5    | 0      | 5      | 6    | 1      | 4     | 0       | 4       | 5     | 1       | 9587.1674  | 0.0020    |
| 5    | 0      | 5      | 5    | 1      | 4     | 0       | 4       | 4     | 1       | 9587.1149  | -0.0024   |
| 5    | 0      | 5      | 4    | 1      | 4     | 0       | 4       | 3     | 1       | 9587.1149  | -0.0026   |
| 5    | 1      | 5      | 6    | 1      | 4     | 1       | 4       | 5     | 1       | 9237.8575  | -0.0025   |
| 5    | 1      | 5      | 5    | 1      | 4     | 1       | 4       | 4     | 1       | 9237.7834  | 0.0012    |
| 5    | 1      | 5      | 4    | 1      | 4     | 1       | 4       | 3     | 1       | 9237.8173  | 0.0061    |
| 5    | 1      | 4      | 6    | 1      | 4     | 1       | 3       | 5     | 1       | 10098.2219 | 0.0014    |
| 5    | 1      | 4      | 5    | 1      | 4     | 1       | 3       | 4     | 1       | 10098.1494 | -0.0020   |
| 5    | 1      | 4      | 4    | 1      | 4     | 1       | 3       | 3     | 1       | 10098.2085 | 0.0033    |
| 6    | 0      | 6      | 7    | 1      | 5     | 0       | 5       | 6     | 1       | 11449.9278 | -0.0015   |
| 6    | 0      | 6      | 6    | 1      | 5     | 0       | 5       | 5     | 1       | 11449.8812 | 0.0010    |
| 6    | 0      | 6      | 5    | 1      | 5     | 0       | 5       | 4     | 1       | 11449.9016 | 0.0033    |
| 6    | 1      | 6      | 7    | 1      | 5     | 1       | 5       | 6     | 1       | 11072.3035 | -0.0024   |
| 6    | 1      | 6      | 6    | 1      | 5     | 1       | 5       | 5     | 1       | 11072.2621 | 0.0091    |
| 6    | 1      | 6      | 5    | 1      | 5     | 1       | 5       | 4     | 1       | 11072.2621 | -0.0078   |

**Table S10.** Observed rotational transitions and residuals (in MHz) for isomer **II** of the thiazole-formaldehyde complex.

| $J'$ | $K_a'$ | $K_c'$ | $F'$ | $J''$ | $K_a''$ | $K_c''$ | $F''$ | Obs.       | Obs.-Cal. |
|------|--------|--------|------|-------|---------|---------|-------|------------|-----------|
| 4    | 0      | 4      | 5    | 3     | 0       | 3       | 4     | 7232.8103  | 0.0007    |
| 4    | 0      | 4      | 4    | 3     | 0       | 3       | 3     | 7232.7594  | 0.0019    |
| 4    | 0      | 4      | 3    | 3     | 0       | 3       | 2     | 7232.7559  | 0.0087    |
| 4    | 1      | 3      | 5    | 3     | 1       | 2       | 4     | 7589.5992  | 0.0016    |
| 4    | 1      | 3      | 4    | 3     | 1       | 2       | 3     | 7589.5086  | 0.0018    |
| 4    | 1      | 3      | 3    | 3     | 1       | 2       | 2     | 7589.5992  | -0.0085   |
| 4    | 2      | 3      | 5    | 3     | 2       | 2       | 4     | 7274.8242  | -0.0002   |
| 4    | 2      | 3      | 4    | 3     | 2       | 2       | 3     | 7274.5027  | -0.0011   |
| 4    | 2      | 2      | 5    | 3     | 2       | 1       | 4     | 7320.5289  | 0.0007    |
| 4    | 2      | 2      | 4    | 3     | 2       | 1       | 3     | 7320.2448  | 0.0028    |
| 5    | 0      | 5      | 6    | 4     | 0       | 4       | 5     | 9007.3200  | 0.0000    |
| 5    | 0      | 5      | 5    | 4     | 0       | 4       | 4     | 9007.2662  | 0.0011    |
| 5    | 0      | 5      | 4    | 4     | 0       | 4       | 3     | 9007.2801  | -0.0047   |
| 5    | 1      | 5      | 6    | 4     | 1       | 4       | 5     | 8678.0996  | 0.0007    |
| 5    | 1      | 5      | 5    | 4     | 1       | 4       | 4     | 8678.0332  | 0.0019    |
| 5    | 1      | 5      | 4    | 4     | 1       | 4       | 3     | 8678.0525  | 0.0009    |
| 5    | 1      | 4      | 6    | 4     | 1       | 3       | 5     | 9477.7287  | -0.0004   |
| 5    | 1      | 4      | 5    | 4     | 1       | 3       | 4     | 9477.6732  | -0.0007   |
| 5    | 1      | 4      | 4    | 4     | 1       | 3       | 3     | 9477.7287  | 0.0007    |
| 5    | 2      | 4      | 6    | 4     | 2       | 3       | 5     | 9087.6778  | 0.0038    |
| 5    | 2      | 4      | 5    | 4     | 2       | 3       | 4     | 9087.4991  | -0.0028   |
| 5    | 2      | 4      | 4    | 4     | 2       | 3       | 3     | 9087.6881  | -0.0037   |
| 5    | 2      | 3      | 6    | 4     | 2       | 2       | 5     | 9178.4123  | 0.0031    |
| 5    | 2      | 3      | 5    | 4     | 2       | 2       | 4     | 9178.2809  | 0.0010    |
| 6    | 0      | 6      | 7    | 5     | 0       | 5       | 6     | 10760.8172 | -0.0005   |
| 6    | 0      | 6      | 6    | 5     | 0       | 5       | 5     | 10760.7568 | -0.0020   |
| 6    | 0      | 6      | 5    | 5     | 0       | 5       | 4     | 10760.7968 | 0.0012    |
| 6    | 1      | 6      | 7    | 5     | 1       | 5       | 6     | 10402.2271 | 0.0025    |
| 6    | 1      | 6      | 6    | 5     | 1       | 5       | 5     | 10402.1831 | 0.0067    |
| 6    | 1      | 6      | 5    | 5     | 1       | 5       | 4     | 10402.1831 | -0.0073   |
| 6    | 1      | 5      | 7    | 5     | 1       | 4       | 6     | 11359.2346 | -0.0001   |
| 6    | 1      | 5      | 6    | 5     | 1       | 4       | 5     | 11359.1964 | 0.0025    |
| 6    | 1      | 5      | 5    | 5     | 1       | 4       | 4     | 11359.2346 | 0.0030    |
| 6    | 2      | 5      | 7    | 5     | 2       | 4       | 6     | 10896.6845 | 0.0022    |
| 6    | 2      | 5      | 6    | 5     | 2       | 4       | 5     | 10896.5729 | -0.0027   |
| 6    | 2      | 5      | 5    | 5     | 2       | 4       | 4     | 10896.6845 | 0.0014    |
| 6    | 2      | 4      | 7    | 5     | 2       | 3       | 6     | 11053.3895 | -0.0034   |
| 6    | 2      | 4      | 6    | 5     | 2       | 3       | 5     | 11053.3310 | -0.0052   |
| 6    | 2      | 4      | 5    | 5     | 2       | 3       | 4     | 11053.3895 | 0.0000    |
| 7    | 0      | 7      | 8    | 6     | 0       | 6       | 7     | 12491.3248 | -0.0033   |
| 7    | 0      | 7      | 7    | 6     | 0       | 6       | 6     | 12491.2693 | 0.0033    |
| 7    | 0      | 7      | 6    | 6     | 0       | 6       | 5     | 12491.3137 | 0.0007    |
| 7    | 1      | 7      | 8    | 6     | 1       | 6       | 7     | 12120.7912 | 0.0025    |
| 7    | 1      | 7      | 7    | 6     | 1       | 6       | 6     | 12120.7483 | -0.0022   |
| 7    | 1      | 7      | 6    | 6     | 1       | 6       | 5     | 12120.7655 | 0.0022    |
| 7    | 1      | 6      | 8    | 6     | 1       | 5       | 7     | 13232.3221 | 0.0010    |
| 7    | 1      | 6      | 7    | 6     | 1       | 5       | 6     | 13232.2809 | -0.0049   |
| 7    | 1      | 6      | 6    | 6     | 1       | 5       | 5     | 13232.3221 | 0.0040    |
| 8    | 0      | 8      | 9    | 7     | 0       | 7       | 8     | 14198.7029 | -0.0008   |
| 8    | 0      | 8      | 8    | 7     | 0       | 7       | 7     | 14198.6406 | 0.0005    |
| 2    | 1      | 2      | 3    | 1     | 0       | 1       | 2     | 7591.0747  | -0.0052   |
| 2    | 1      | 2      | 2    | 1     | 0       | 1       | 1     | 7590.9705  | -0.0032   |
| 2    | 1      | 2      | 1    | 1     | 0       | 1       | 0     | 7590.4779  | -0.0030   |
| 2    | 2      | 1      | 3    | 1     | 1       | 0       | 2     | 16135.5555 | 0.0017    |
| 2    | 2      | 1      | 2    | 1     | 1       | 0       | 1     | 16135.5555 | 0.0046    |

|   |   |   |   |   |   |   |   |            |         |
|---|---|---|---|---|---|---|---|------------|---------|
| 2 | 2 | 0 | 3 | 1 | 1 | 1 | 2 | 16300.3004 | 0.0043  |
| 2 | 2 | 0 | 2 | 1 | 1 | 1 | 1 | 16301.1090 | -0.0023 |
| 3 | 1 | 3 | 4 | 2 | 0 | 2 | 3 | 9172.0304  | -0.0019 |
| 3 | 1 | 3 | 3 | 2 | 0 | 2 | 2 | 9171.7597  | -0.0039 |
| 3 | 1 | 3 | 2 | 2 | 0 | 2 | 1 | 9171.9623  | -0.0072 |
| 3 | 2 | 2 | 2 | 2 | 1 | 1 | 1 | 17794.8596 | 0.0035  |
| 3 | 2 | 2 | 4 | 2 | 1 | 1 | 3 | 17794.8256 | 0.0006  |
| 3 | 2 | 2 | 3 | 2 | 1 | 1 | 2 | 17794.7681 | -0.0004 |
| 3 | 2 | 1 | 2 | 2 | 1 | 2 | 1 | 18297.9609 | -0.0012 |
| 3 | 2 | 1 | 4 | 2 | 1 | 2 | 3 | 18298.4232 | 0.0006  |
| 3 | 2 | 1 | 3 | 2 | 1 | 2 | 2 | 18299.2666 | -0.0002 |
| 4 | 1 | 4 | 3 | 3 | 0 | 3 | 2 | 10680.4563 | 0.0047  |
| 4 | 1 | 4 | 4 | 3 | 0 | 3 | 3 | 10680.1151 | -0.0024 |
| 4 | 1 | 4 | 5 | 3 | 0 | 3 | 4 | 10680.4407 | -0.0028 |
| 4 | 2 | 3 | 4 | 3 | 1 | 2 | 3 | 19373.0458 | 0.0033  |
| 4 | 2 | 3 | 5 | 3 | 1 | 2 | 4 | 19373.2285 | 0.0057  |
| 2 | 2 | 0 | 3 | 2 | 1 | 1 | 3 | 12340.4877 | 0.0007  |
| 2 | 2 | 0 | 2 | 2 | 1 | 1 | 2 | 12341.1895 | -0.0034 |
| 2 | 2 | 0 | 1 | 2 | 1 | 1 | 1 | 12340.0925 | -0.0018 |
| 5 | 1 | 5 | 5 | 4 | 0 | 4 | 4 | 12125.3891 | -0.0022 |
| 5 | 1 | 5 | 4 | 4 | 0 | 4 | 3 | 12125.7561 | 0.0001  |
| 5 | 1 | 5 | 6 | 4 | 0 | 4 | 5 | 12125.7325 | -0.0002 |
| 5 | 2 | 4 | 6 | 5 | 1 | 5 | 6 | 13795.1984 | 0.0064  |
| 5 | 2 | 4 | 5 | 5 | 1 | 5 | 5 | 13795.9048 | -0.0034 |
| 5 | 2 | 4 | 4 | 5 | 1 | 5 | 4 | 13795.0375 | -0.0085 |
| 5 | 2 | 3 | 6 | 5 | 1 | 4 | 6 | 11552.9498 | 0.0054  |
| 5 | 2 | 3 | 5 | 5 | 1 | 4 | 5 | 11552.8566 | 0.0000  |
| 5 | 2 | 3 | 4 | 5 | 1 | 4 | 4 | 11552.9607 | -0.0014 |
| 6 | 1 | 6 | 6 | 5 | 0 | 5 | 5 | 13520.3037 | 0.0011  |
| 6 | 1 | 6 | 5 | 5 | 0 | 5 | 4 | 13520.6601 | -0.0014 |
| 6 | 1 | 6 | 7 | 5 | 0 | 5 | 6 | 13520.6399 | 0.0026  |
| 7 | 1 | 7 | 8 | 6 | 0 | 6 | 7 | 14880.6089 | 0.0007  |
| 7 | 1 | 7 | 7 | 6 | 0 | 6 | 6 | 14880.2919 | -0.0023 |
| 7 | 1 | 7 | 6 | 6 | 0 | 6 | 5 | 14880.6256 | -0.0036 |

**Table S11.** Observed rotational transitions and residuals (in MHz) for  $^{18}\text{O}9$  isotopologue of isomer **II** of the thiazole-formaldehyde complex.

| $J'$ | $K_a'$ | $K_c'$ | $F'$ | $J''$ | $K_a''$ | $K_c''$ | $F''$ | Obs.       | Obs.-Cal. |
|------|--------|--------|------|-------|---------|---------|-------|------------|-----------|
| 5    | 0      | 5      | 6    | 4     | 0       | 4       | 5     | 8687.1768  | -0.0031   |
| 5    | 0      | 5      | 5    | 4     | 0       | 4       | 4     | 8687.1308  | 0.0036    |
| 7    | 0      | 7      | 8    | 6     | 0       | 6       | 7     | 12056.1798 | 0.0049    |
| 7    | 0      | 7      | 7    | 6     | 0       | 6       | 6     | 12056.1242 | 0.0094    |
| 7    | 1      | 7      | 8    | 6     | 1       | 6       | 7     | 11699.0018 | -0.0095   |
| 7    | 1      | 7      | 7    | 6     | 1       | 6       | 6     | 11698.9627 | -0.0114   |
| 2    | 2      | 1      | 3    | 1     | 1       | 0       | 2     | 15965.8640 | -0.0174   |
| 2    | 2      | 1      | 2    | 1     | 1       | 0       | 1     | 15965.8640 | -0.0011   |
| 2    | 2      | 0      | 3    | 1     | 1       | 1       | 2     | 16120.0843 | -0.0054   |
| 2    | 2      | 0      | 2    | 1     | 1       | 1       | 1     | 16120.8974 | -0.0009   |
| 3    | 1      | 3      | 4    | 2     | 0       | 2       | 3     | 8989.2475  | 0.0078    |
| 3    | 1      | 3      | 3    | 2     | 0       | 2       | 2     | 8988.9683  | 0.0061    |
| 4    | 1      | 4      | 3    | 3     | 0       | 3       | 2     | 10450.3760 | -0.0084   |
| 4    | 1      | 4      | 4    | 3     | 0       | 3       | 3     | 10450.0336 | -0.0047   |
| 4    | 1      | 4      | 5    | 3     | 0       | 3       | 4     | 10450.3760 | 0.0035    |
| 4    | 2      | 3      | 4    | 3     | 1       | 2       | 3     | 19096.1275 | 0.0018    |
| 4    | 2      | 3      | 5    | 3     | 1       | 2       | 4     | 19096.3287 | 0.0121    |
| 5    | 1      | 5      | 4    | 4     | 0       | 4       | 3     | 11851.3836 | -0.0015   |
| 5    | 1      | 5      | 6    | 4     | 0       | 4       | 5     | 11851.3655 | 0.0064    |
| 6    | 1      | 6      | 6    | 5     | 0       | 5       | 5     | 13203.1227 | 0.0019    |
| 6    | 1      | 6      | 5    | 5     | 0       | 5       | 4     | 13203.4884 | -0.0033   |
| 6    | 1      | 6      | 7    | 5     | 0       | 5       | 6     | 13203.4654 | 0.0004    |
| 3    | 2      | 2      | 3    | 2     | 1       | 1       | 2     | 17568.9280 | -0.0025   |
| 3    | 2      | 2      | 2    | 2     | 1       | 1       | 2     | 17568.9280 | -0.0026   |
| 3    | 2      | 2      | 3    | 2     | 1       | 1       | 3     | 17568.9984 | -0.0017   |
| 3    | 2      | 2      | 4    | 2     | 1       | 1       | 3     | 17568.9984 | -0.0016   |
| 3    | 2      | 2      | 2    | 2     | 1       | 1       | 1     | 17569.0372 | -0.0012   |
| 3    | 2      | 1      | 4    | 2     | 1       | 2       | 3     | 18039.9181 | -0.0023   |
| 3    | 2      | 1      | 3    | 2     | 1       | 2       | 3     | 18039.9666 | 0.0066    |

**Table S12.** Observed rotational transitions and residuals (in MHz) for isomer **III** of the thiazole-formaldehyde complex.

| $J'$ | $K_a'$ | $K_c'$ | $F'$ | $\nu'$ | $J''$ | $K_a''$ | $K_c''$ | $F''$ | $\nu''$ | Obs.       | Obs.-Cal. |
|------|--------|--------|------|--------|-------|---------|---------|-------|---------|------------|-----------|
| 4    | 0      | 4      | 5    | 1      | 3     | 0       | 3       | 4     | 1       | 7181.0266  | 0.0016    |
| 4    | 0      | 4      | 4    | 1      | 3     | 0       | 3       | 3     | 1       | 7180.9840  | -0.0054   |
| 4    | 0      | 4      | 3    | 1      | 3     | 0       | 3       | 2     | 1       | 7180.9480  | 0.0023    |
| 4    | 1      | 4      | 5    | 1      | 3     | 1       | 3       | 4     | 1       | 6970.9490  | -0.0006   |
| 4    | 1      | 4      | 4    | 1      | 3     | 1       | 3       | 3     | 1       | 6970.8227  | -0.0037   |
| 4    | 1      | 4      | 3    | 1      | 3     | 1       | 3       | 2     | 1       | 6970.8751  | -0.0064   |
| 4    | 1      | 3      | 5    | 1      | 3     | 1       | 2       | 4     | 1       | 7416.0047  | -0.0092   |
| 4    | 1      | 3      | 4    | 1      | 3     | 1       | 2       | 3     | 1       | 7415.9153  | 0.0078    |
| 4    | 1      | 3      | 3    | 1      | 3     | 1       | 2       | 2     | 1       | 7416.0047  | -0.0057   |
| 4    | 2      | 3      | 5    | 1      | 3     | 2       | 2       | 4     | 1       | 7195.4335  | -0.0002   |
| 4    | 2      | 3      | 4    | 1      | 3     | 2       | 2       | 3     | 1       | 7195.0492  | -0.0005   |
| 4    | 2      | 3      | 3    | 1      | 3     | 2       | 2       | 2     | 1       | 7195.5287  | -0.0036   |
| 4    | 2      | 2      | 5    | 1      | 3     | 2       | 1       | 4     | 1       | 7210.9874  | 0.0000    |
| 4    | 2      | 2      | 4    | 1      | 3     | 2       | 1       | 3     | 1       | 7210.6208  | 0.0030    |
| 4    | 2      | 2      | 3    | 1      | 3     | 2       | 1       | 2     | 1       | 7211.0770  | -0.0070   |
| 5    | 0      | 5      | 6    | 1      | 4     | 0       | 4       | 5     | 1       | 8964.5623  | -0.0023   |
| 5    | 0      | 5      | 5    | 1      | 4     | 0       | 4       | 4     | 1       | 8964.5268  | -0.0051   |
| 5    | 0      | 5      | 4    | 1      | 4     | 0       | 4       | 3     | 1       | 8964.5180  | -0.0005   |
| 5    | 1      | 5      | 6    | 1      | 4     | 1       | 4       | 5     | 1       | 8710.7449  | -0.0010   |
| 5    | 1      | 5      | 5    | 1      | 4     | 1       | 4       | 4     | 1       | 8710.6758  | 0.0009    |
| 5    | 1      | 5      | 4    | 1      | 4     | 1       | 4       | 3     | 1       | 8710.6962  | -0.0002   |
| 5    | 1      | 4      | 6    | 1      | 4     | 1       | 3       | 5     | 1       | 9266.8749  | -0.0065   |
| 5    | 1      | 4      | 5    | 1      | 4     | 1       | 3       | 4     | 1       | 9266.8194  | -0.0022   |
| 5    | 2      | 4      | 6    | 1      | 4     | 2       | 3       | 5     | 1       | 8992.1874  | 0.0000    |
| 5    | 2      | 4      | 5    | 1      | 4     | 2       | 3       | 4     | 1       | 8991.9836  | -0.0010   |
| 5    | 2      | 4      | 4    | 1      | 4     | 2       | 3       | 3     | 1       | 8992.2030  | -0.0050   |
| 5    | 2      | 3      | 6    | 1      | 4     | 2       | 2       | 5     | 1       | 9023.2418  | 0.0017    |
| 5    | 2      | 3      | 5    | 1      | 4     | 2       | 2       | 4     | 1       | 9023.0572  | 0.0017    |
| 5    | 2      | 3      | 4    | 1      | 4     | 2       | 2       | 3     | 1       | 9023.2563  | -0.0024   |
| 5    | 3      | 3      | 6    | 1      | 4     | 3       | 2       | 5     | 1       | 9000.8865  | 0.0013    |
| 5    | 3      | 3      | 5    | 1      | 4     | 3       | 2       | 4     | 1       | 9000.4527  | -0.0037   |
| 5    | 3      | 2      | 6    | 1      | 4     | 3       | 1       | 5     | 1       | 9001.1697  | -0.0012   |
| 5    | 3      | 2      | 5    | 1      | 4     | 3       | 1       | 4     | 1       | 9000.7386  | -0.0040   |
| 6    | 0      | 6      | 7    | 1      | 5     | 0       | 5       | 6     | 1       | 10740.4289 | 0.0001    |
| 6    | 0      | 6      | 6    | 1      | 5     | 0       | 5       | 5     | 1       | 10740.3944 | -0.0019   |
| 6    | 0      | 6      | 5    | 1      | 5     | 0       | 5       | 4     | 1       | 10740.3944 | -0.0042   |
| 6    | 1      | 6      | 7    | 1      | 5     | 1       | 5       | 6     | 1       | 10448.6867 | 0.0027    |
| 6    | 1      | 6      | 6    | 1      | 5     | 1       | 5       | 5     | 1       | 10448.6346 | -0.0021   |
| 6    | 1      | 5      | 7    | 1      | 5     | 1       | 4       | 6     | 1       | 11115.5999 | -0.0030   |
| 6    | 1      | 5      | 6    | 1      | 5     | 1       | 4       | 5     | 1       | 11115.5588 | -0.0049   |
| 6    | 1      | 5      | 5    | 1      | 5     | 0       | 3       | 4     | 1       | 11115.5950 | 0.0028    |
| 6    | 2      | 5      | 7    | 1      | 5     | 2       | 4       | 6     | 1       | 10787.6025 | -0.0021   |
| 6    | 2      | 5      | 6    | 1      | 5     | 2       | 4       | 5     | 1       | 10787.4809 | -0.0016   |
| 6    | 2      | 5      | 5    | 1      | 5     | 2       | 4       | 4     | 1       | 10787.6025 | -0.0022   |
| 6    | 2      | 4      | 7    | 1      | 5     | 2       | 3       | 6     | 1       | 10841.7686 | -0.0015   |
| 6    | 2      | 4      | 6    | 1      | 5     | 2       | 3       | 5     | 1       | 10841.6725 | 0.0027    |
| 6    | 2      | 4      | 5    | 1      | 5     | 2       | 3       | 4     | 1       | 10841.7686 | 0.0002    |
| 6    | 3      | 4      | 7    | 1      | 5     | 3       | 3       | 6     | 1       | 10802.7972 | 0.0007    |
| 6    | 3      | 4      | 6    | 1      | 5     | 3       | 3       | 5     | 1       | 10802.5447 | -0.0012   |

**Table S13.** Observed rotational transitions and residuals (in MHz) for  $^{18}\text{O}_9$  isotopologue of isomer **III** of the thiazole-formaldehyde complex.

| $J'$ | $K_a'$ | $K_c'$ | $F'$ | $v'$ | $J''$ | $K_a''$ | $K_c''$ | $F''$ | $v''$ | Obs.       | Obs.-Cal. |
|------|--------|--------|------|------|-------|---------|---------|-------|-------|------------|-----------|
| 4    | 0      | 4      | 5    | 0    | 3     | 0       | 3       | 4     | 0     | 6902.3250  | -0.0041   |
| 4    | 0      | 4      | 3    | 0    | 3     | 0       | 3       | 2     | 0     | 6902.2487  | 0.0022    |
| 5    | 0      | 5      | 6    | 0    | 4     | 0       | 4       | 5     | 0     | 8617.6893  | -0.0012   |
| 5    | 0      | 5      | 5    | 0    | 4     | 0       | 4       | 4     | 0     | 8617.6667  | 0.0052    |
| 5    | 0      | 5      | 4    | 0    | 4     | 0       | 4       | 3     | 0     | 8617.6438  | 0.0015    |
| 5    | 1      | 4      | 6    | 0    | 4     | 1       | 3       | 5     | 0     | 8897.9007  | -0.0034   |
| 5    | 1      | 4      | 5    | 0    | 4     | 1       | 3       | 4     | 0     | 8897.8360  | -0.0062   |
| 5    | 1      | 4      | 4    | 0    | 4     | 1       | 3       | 3     | 0     | 8897.8818  | -0.0065   |
| 6    | 0      | 6      | 7    | 0    | 5     | 0       | 5       | 6     | 0     | 10326.3465 | 0.0021    |
| 6    | 0      | 6      | 6    | 0    | 5     | 0       | 5       | 5     | 0     | 10326.3127 | -0.0037   |
| 6    | 0      | 6      | 5    | 0    | 5     | 0       | 5       | 4     | 0     | 10326.3127 | 0.0000    |
| 6    | 1      | 5      | 7    | 0    | 5     | 1       | 4       | 6     | 0     | 10673.4254 | 0.0018    |
| 6    | 1      | 5      | 6    | 0    | 5     | 1       | 4       | 5     | 0     | 10673.3850 | 0.0014    |
| 6    | 1      | 5      | 5    | 0    | 5     | 1       | 4       | 4     | 0     | 10673.4125 | 0.0030    |
| 7    | 0      | 7      | 8    | 0    | 6     | 0       | 6       | 7     | 0     | 12027.1110 | 0.0051    |
| 7    | 0      | 7      | 7    | 0    | 6     | 0       | 6       | 6     | 0     | 12027.0669 | -0.0110   |
| 7    | 0      | 7      | 6    | 0    | 6     | 0       | 6       | 5     | 0     | 12027.0864 | 0.0028    |
| 7    | 1      | 6      | 8    | 0    | 6     | 1       | 5       | 7     | 0     | 12446.6401 | 0.0051    |
| 7    | 1      | 6      | 7    | 0    | 6     | 1       | 5       | 6     | 0     | 12446.6078 | 0.0016    |
| 7    | 1      | 6      | 6    | 0    | 6     | 1       | 5       | 5     | 0     | 12446.6228 | -0.0007   |
| 4    | 0      | 4      | 5    | 1    | 3     | 0       | 3       | 4     | 1     | 6902.6039  | -0.0107   |
| 4    | 0      | 4      | 4    | 1    | 3     | 0       | 3       | 3     | 1     | 6902.5694  | -0.0122   |
| 4    | 0      | 4      | 3    | 1    | 3     | 0       | 3       | 2     | 1     | 6902.5264  | -0.0054   |
| 5    | 0      | 5      | 6    | 1    | 4     | 0       | 4       | 5     | 1     | 8618.0366  | -0.0105   |
| 5    | 0      | 5      | 5    | 1    | 4     | 0       | 4       | 4     | 1     | 8618.0117  | -0.0062   |
| 5    | 0      | 5      | 4    | 1    | 4     | 0       | 4       | 3     | 1     | 8617.9966  | -0.0021   |
| 5    | 1      | 5      | 6    | 1    | 4     | 1       | 4       | 5     | 1     | 8380.1016  | -0.0064   |
| 5    | 1      | 5      | 5    | 1    | 4     | 1       | 4       | 4     | 1     | 8380.0281  | -0.0085   |
| 5    | 1      | 5      | 4    | 1    | 4     | 1       | 4       | 3     | 1     | 8380.0538  | -0.0066   |
| 5    | 1      | 4      | 6    | 1    | 4     | 1       | 3       | 5     | 1     | 8898.2286  | -0.0015   |
| 5    | 1      | 4      | 5    | 1    | 4     | 1       | 3       | 4     | 1     | 8898.1653  | -0.0028   |
| 5    | 1      | 4      | 4    | 1    | 4     | 1       | 3       | 3     | 1     | 8898.2125  | -0.0017   |
| 6    | 0      | 6      | 7    | 1    | 5     | 0       | 5       | 6     | 1     | 10326.7670 | -0.0048   |
| 6    | 0      | 6      | 6    | 1    | 5     | 0       | 5       | 5     | 1     | 10326.7310 | -0.0129   |
| 6    | 0      | 6      | 5    | 1    | 5     | 0       | 5       | 4     | 1     | 10326.7310 | -0.0091   |
| 6    | 1      | 6      | 7    | 1    | 5     | 1       | 5       | 6     | 1     | 10052.4355 | 0.0011    |
| 6    | 1      | 6      | 6    | 1    | 5     | 1       | 5       | 5     | 1     | 10052.3891 | 0.0013    |
| 6    | 1      | 6      | 5    | 1    | 5     | 1       | 5       | 4     | 1     | 10052.4071 | 0.0078    |
| 6    | 1      | 5      | 7    | 1    | 5     | 1       | 4       | 6     | 1     | 10673.8157 | 0.0012    |
| 6    | 1      | 5      | 6    | 1    | 5     | 1       | 4       | 5     | 1     | 10673.7787 | 0.0042    |
| 6    | 1      | 5      | 5    | 1    | 5     | 1       | 4       | 4     | 1     | 10673.8003 | -0.0001   |
| 7    | 0      | 7      | 8    | 1    | 6     | 0       | 6       | 7     | 1     | 12027.5963 | -0.0079   |
| 7    | 0      | 7      | 7    | 1    | 6     | 0       | 6       | 6     | 1     | 12027.5720 | -0.0042   |
| 7    | 1      | 7      | 8    | 1    | 6     | 1       | 6       | 7     | 1     | 11722.8672 | 0.0105    |
| 7    | 1      | 7      | 7    | 1    | 6     | 1       | 6       | 6     | 1     | 11722.8376 | 0.0145    |
| 7    | 1      | 6      | 8    | 1    | 6     | 1       | 5       | 7     | 1     | 12447.0970 | 0.0061    |
| 7    | 1      | 6      | 7    | 1    | 6     | 1       | 5       | 6     | 1     | 12447.0724 | 0.0103    |
| 7    | 1      | 6      | 6    | 1    | 6     | 1       | 5       | 5     | 1     | 12447.0813 | 0.0018    |
| 8    | 0      | 8      | 9    | 1    | 7     | 0       | 7       | 8     | 1     | 13719.5264 | 0.0059    |
| 8    | 0      | 8      | 8    | 1    | 7     | 0       | 7       | 7     | 1     | 13719.5023 | 0.0103    |

**Table S14.**  $r_s$ ,  $r_0$ , and  $r_e$  coordinates for isomers **I** - **III**.

|                   | $a/\text{\AA}$ |           |            | $b/\text{\AA}$ |            |           | $c/\text{\AA}$ |       |       |
|-------------------|----------------|-----------|------------|----------------|------------|-----------|----------------|-------|-------|
|                   | $r_e$          | $r_0$     | $r_s$      | $r_e$          | $r_0$      | $r_s$     | $r_e$          | $r_0$ | $r_s$ |
| <b>I</b>          |                |           |            |                |            |           |                |       |       |
| <sup>34</sup> S1  | 1.735          | 1.744(1)  | ±1.7105(9) | 0.943          | 0.9344(9)  | ±0.944(2) | 0              | 0     | 0     |
| <sup>13</sup> C4  | 0.979          | 0.965(1)  | ±0.953(2)  | -1.481         | -1.4809(2) | ±1.475(1) | 0              | 0     | 0     |
| <sup>13</sup> C5  | 2.122          | 2.1156(8) | ±2.1153(8) | -0.744         | -0.756(1)  | ±0.713(2) | 0              | 0     | 0     |
| <sup>18</sup> O9  | -3.180         | -3.151(5) | ±3.1429(5) | 0.712          | 0.719(1)   | ±0.719(2) | 0              | 0     | 0     |
| <sup>13</sup> C10 | -3.077         | -3.104(5) | ±3.0729(6) | -0.491         | -0.4863(7) | ±0.487(4) | 0              | 0     | 0     |
| <b>II</b>         |                |           |            |                |            |           |                |       |       |
| <sup>18</sup> O9  | -3.254         | -3.21(2)  | ±3.2152(5) | 0.699          | 0.7078(8)  | ±0.702(2) | 0              | 0     | 0     |
| <b>III</b>        |                |           |            |                |            |           |                |       |       |
| <sup>18</sup> O9  | 3.403          | 3.43(2)   | ±3.3748(7) | -0.551         | -0.531(8)  | ±0.548(4) | 0              | 0     | 0     |

<sup>a</sup> In parentheses are the Costain's error in units of the last digit.



**Table S15.** The result of NBO analysis for isomer I.

| From thiazole to formaldehyde |                           |                     | From formaldehyde to thiazole |              |                     |
|-------------------------------|---------------------------|---------------------|-------------------------------|--------------|---------------------|
| Donor NBO <sup>a</sup>        | Acceptor NBO <sup>b</sup> | $E^{(2)}$ /kcal/mol | Donor NBO                     | Acceptor NBO | $E^{(2)}$ /kcal/mol |
| BD(1)C2-N3                    | RY*(1)C10                 | 0.07                | BD(1)C10-O9                   | RY*(2)C2     | 0.11                |
| BD(1)C2-N3                    | RY*(6)C10                 | 0.06                | BD(1)C10-O9                   | RY*(3)H8     | 0.05                |
| BD(1)C2-N3                    | BD*(2)C10-O9              | 0.07                | BD(2)C10-O9                   | RY*(3)H8     | 0.05                |
| BD(1)C2-H8                    | RY*(5)C10                 | 0.10                | BD(2)C10-O9                   | BD*(1)C2-S1  | 0.27                |
| BD(1)C2-H8                    | RY*(4)O9                  | 0.06                | BD(2)C10-O9                   | BD*(1)C2-H8  | 0.23                |
| BD(1)N3-C4                    | RY*(3)C10                 | 0.22                | BD(2)C10-O9                   | BD*(1)N3-C4  | 0.16                |
| BD(1)N3-C4                    | RY*(4)C10                 | 0.11                | LP(2)O9                       | RY*(8)C2     | 0.05                |
| BD(1)N3-C4                    | RY*(6)C10                 | 0.05                | LP(2)O9                       | BD*(1)C2-H8  | 0.20                |
| LP(1)N3                       | RY*(4)C10                 | 0.06                |                               |              |                     |
| LP(1)N3                       | RY*(1)H11                 | 0.16                |                               |              |                     |
| LP(1)N3                       | RY*(2)H11                 | 0.09                |                               |              |                     |
| LP(1)N3                       | RY*(1)H12                 | 0.16                |                               |              |                     |
| LP(1)N3                       | RY*(2)H12                 | 0.09                |                               |              |                     |
| LP(1)N3                       | BD*(2)C10-O9              | 2.51                |                               |              |                     |

<sup>a</sup>BD for 2-center bond, LP for 1-center valence lone pair the unstarred and starred labels corresponding to Lewis and non-Lewis NBOs, respectively.

<sup>b</sup>RY\* for 1-center Rydberg, and BD\* for 2-center antibond, the unstarred and starred labels corresponding to Lewis and non-Lewis NBOs, respectively.

**Table S16.** The result of NBO analysis for isomer II.

| From thiazole to formaldehyde |                           |                     | From formaldehyde to thiazole |              |                     |
|-------------------------------|---------------------------|---------------------|-------------------------------|--------------|---------------------|
| Donor NBO <sup>a</sup>        | Acceptor NBO <sup>b</sup> | $E^{(2)}$ /kcal/mol | Donor NBO                     | Acceptor NBO | $E^{(2)}$ /kcal/mol |
| BD(1)C2-N3                    | RY*(3)C10                 | 0.20                | BD(1)C10-O9                   | RY*(2)C4     | 0.10                |
| BD(1)C2-N3                    | RY*(4)C10                 | 0.13                | BD(1)C10-O9                   | RY*(2)H7     | 0.12                |
| BD(1)N3-C4                    | RY*(1)C10                 | 0.06                | BD(2)C10-O9                   | RY*(2)H7     | 0.08                |
| BD(1)N3-C4                    | BD*(2)C10-O9              | 0.05                | BD(2)C10-O9                   | BD*(1)C2-N3  | 0.13                |
| BD(1)C4-H7                    | RY*(5)C10                 | 0.06                | BD(2)C10-O9                   | BD*(1)C4-C5  | 0.17                |
| LP(1)N3                       | RY*(4)C10                 | 0.06                | BD(2)C10-O9                   | BD*(1)C4-H7  | 0.22                |
| LP(1)N3                       | RY*(1)H11                 | 0.15                | LP(1)O9                       | BD*(1)C4-H7  | 0.14                |
| LP(1)N3                       | RY*(2)H11                 | 0.09                |                               |              |                     |
| LP(1)N3                       | RY*(1)H11                 | 0.15                |                               |              |                     |
| LP(1)N3                       | RY*(2)H11                 | 0.09                |                               |              |                     |
| LP(1)N3                       | BD*(2)C10-O9              | 2.29                |                               |              |                     |

<sup>a</sup>BD for 2-center bond, LP for 1-center valence lone pair the unstarred and starred labels corresponding to Lewis and non-Lewis NBOs, respectively.

<sup>b</sup>RY\* for 1-center Rydberg, and BD\* for 2-center antibond, the unstarred and starred labels corresponding to Lewis and non-Lewis NBOs, respectively.

**Table S17.** The result of NBO analysis for isomer III.

| From thiazole to formaldehyde |                           |                     | From formaldehyde to thiazole |              |                     |
|-------------------------------|---------------------------|---------------------|-------------------------------|--------------|---------------------|
| Donor NBO <sup>a</sup>        | Acceptor NBO <sup>b</sup> | $E^{(2)}$ /kcal/mol | Donor NBO                     | Acceptor NBO | $E^{(2)}$ /kcal/mol |
| BD(1)C2-H8                    | RY*(4)C10                 | 0.07                | BD(2)O9-C10                   | RY*(2)C2     | 0.06                |
| BD(1)C2-H8                    | RY*(4)H11                 | 0.10                | BD(1)C10-H11                  | BD*(1)N3-C4  | 0.09                |
| BD(1)N3-C4                    | RY*(2)H11                 | 0.12                | BD(1)C10-H12                  | RY*(2)H8     | 0.05                |
| BD(1)N3-C4                    | RY*(4)H11                 | 0.06                | LP(1)O9                       | BD*(1)C2-H8  | 0.40                |
| BD(1)C4-H7                    | RY*(1)H11                 | 0.09                | LP(2)O9                       | RY*(1)H8     | 0.08                |
| LP(1)N3                       | RY*(4)C10                 | 0.05                | LP(2)O9                       | RY*(2)H8     | 0.06                |
| LP(1)N3                       | RY*(1)H11                 | 0.39                | LP(2)O9                       | BD*(1)C2-S1  | 0.18                |
| LP(1)N3                       | RY*(2)H11                 | 0.15                | LP(2)O9                       | BD*(1)C2-H8  | 1.11                |
| LP(1)N3                       | BD*(1)C10-H11             | 0.98                |                               |              |                     |

<sup>a</sup>BD for 2-center bond, LP for 1-center valence lone pair the unstarred and starred labels corresponding to Lewis and non-Lewis NBOs, respectively.

<sup>b</sup>RY\* for 1-center Rydberg, and BD\* for 2-center antibond, the unstarred and starred labels corresponding to Lewis and non-Lewis NBOs, respectively.

**Table S18.** The result of NBO analysis for isomer IV.

| From thiazole to formaldehyde |                           |                     | From formaldehyde to thiazole |              |                     |
|-------------------------------|---------------------------|---------------------|-------------------------------|--------------|---------------------|
| Donor NBO <sup>a</sup>        | Acceptor NBO <sup>b</sup> | $E^{(2)}$ /kcal/mol | Donor NBO                     | Acceptor NBO | $E^{(2)}$ /kcal/mol |
| BD(1)C2-N3                    | RY*(2)H11                 | 0.13                | BD(2)O9-C10                   | RY*(2)C4     | 0.05                |
| BD(1)C2-N3                    | RY*(3)H11                 | 0.06                | BD(2)O9-C10                   | RY*(1)H7     | 0.13                |
| BD(1)C4-H7                    | RY*(4)C10                 | 0.07                | BD(1)C10-H12                  | RY*(1)H7     | 0.06                |
| BD(1)C4-H7                    | RY*(3)H11                 | 0.09                | BD(1)C10-H11                  | BD*(1)C2-N3  | 0.06                |
| LP(1)N3                       | RY*(3)C10                 | 0.06                | LP(1)O9                       | BD*(1)C4-H7  | 0.28                |
| LP(1)N3                       | RY*(1)H11                 | 0.35                | LP(2)O9                       | RY*(1)H7     | 0.13                |
| LP(1)N3                       | RY*(2)H11                 | 0.15                | LP(2)O9                       | BD*(1)C4-C5  | 0.07                |
| LP(1)N3                       | BD*(1)C10-H11             | 1.02                | LP(2)O9                       | BD*(1)C4-H7  | 0.94                |

<sup>a</sup>BD for 2-center bond, LP for 1-center valence lone pair the unstarred and starred labels corresponding to Lewis and non-Lewis NBOs, respectively.

<sup>b</sup>RY\* for 1-center Rydberg, and BD\* for 2-center antibond, the unstarred and starred labels corresponding to Lewis and non-Lewis NBOs, respectively.
